# Supplementary material for: Efficient motif search in ranked lists and applications to variable gap motifs
Source: PubMed Central journal article supplement — Nucleic Acids Res. 2012 Mar 13;40(13):5832–47. doi: 10.1093/nar/gks206 (PMC3401424; doi:10.1093/nar/gks206), 2012-03-13
Supplement: supp_gks206_nar-02953-h-2011-File009.pdf [file supp_gks206_nar-02953-h-2011-File009.pdf]

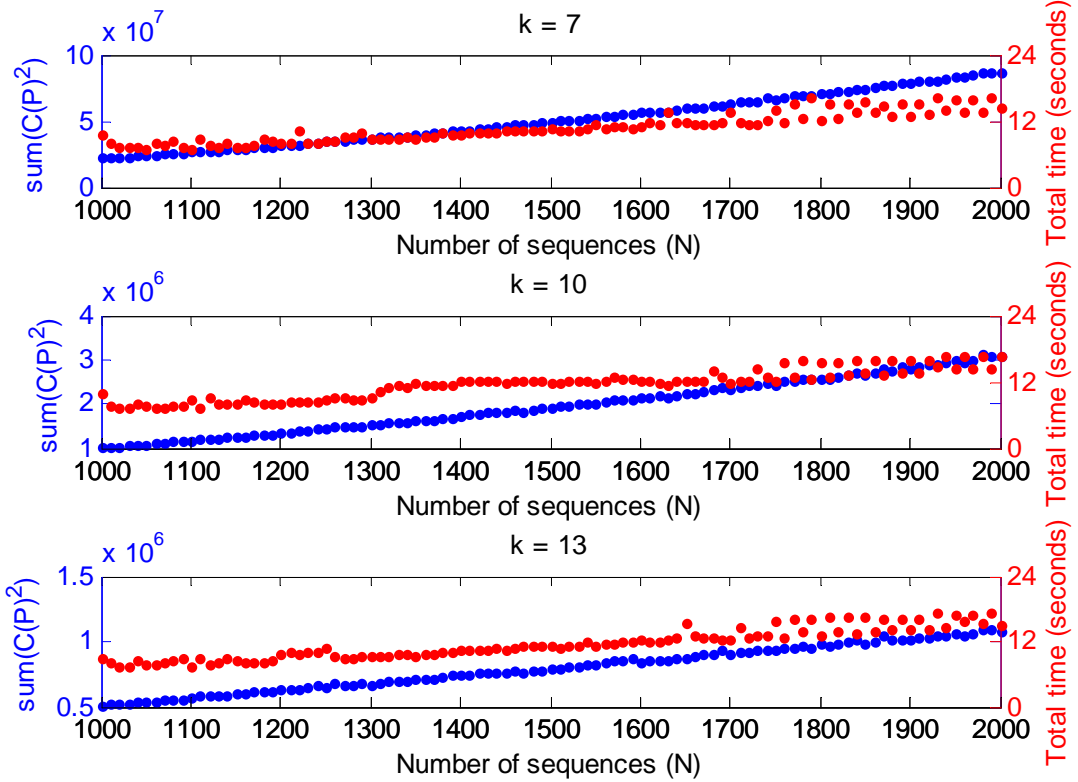

**Figure S1 – Evaluating DRIMUST time complexity and actual performance**

The total complexity of this algorithm is  $\sum_P |C(P)|^2$ . This quantity was evaluated for datasets with actual biological sequences of total size 500,000-1,000,000 characters, testing three lengths of motifs: 7, 10 and 13. Results are shown in blue (left y axis). Additionally, the total running time, on a standard PC, was measured for these datasets – see red graph (right y axis; time is in seconds).

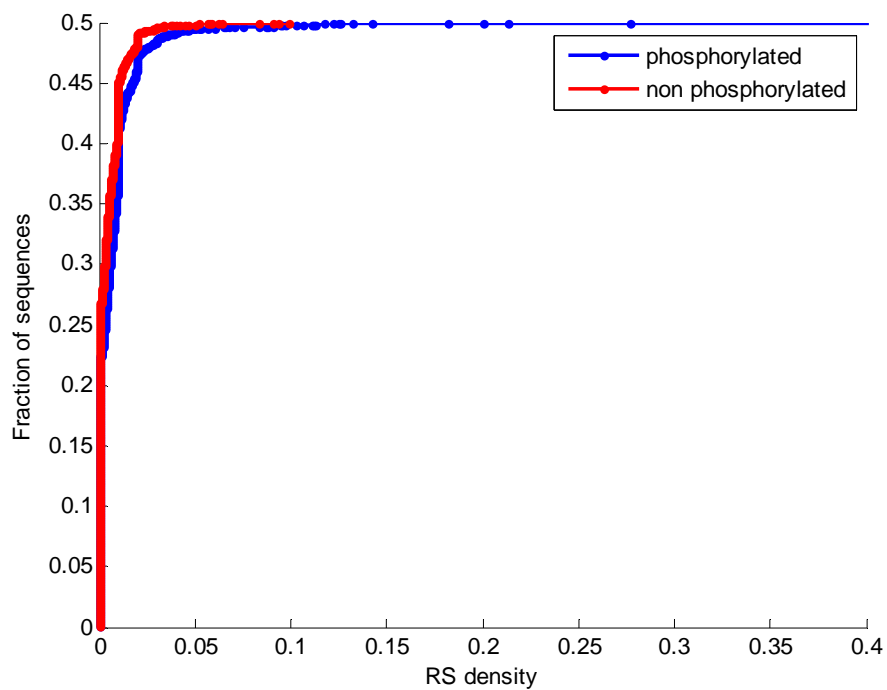

**Figure S2 – RS di-residual density comparison of serine phosphorylated and non-phosphorylated sequences in humans**

We compared RS di-residual density among serine phosphorylated and non-phosphorylated sequences. For each value, the number of sequences having RS density smaller than this value is indicated.

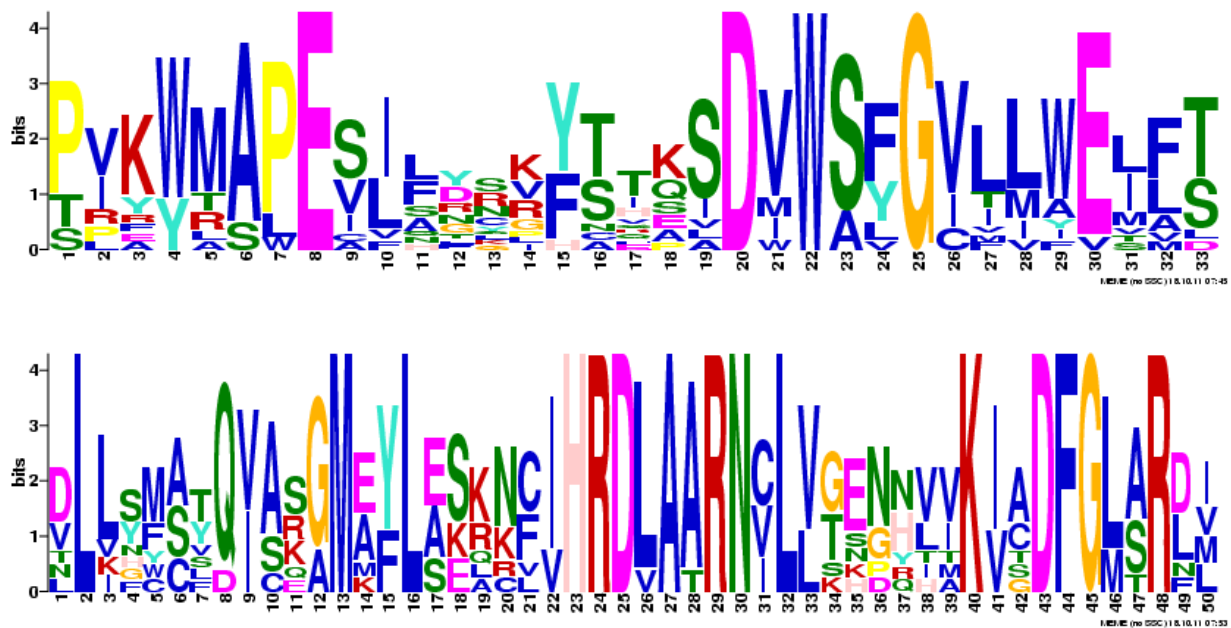

**Figure S3 – MEME’s output for tyrosine phosphorylated sequences**

The motif SDVW appears as part of the upper logo, and the motif HRDLAARN-X<sup>12</sup>-DFGL is present at the lower logo, consistent with DRIMUST predictions.

**Table S1**

The motifs predicted by DRIMUST on the Harbison dataset

| <b>TF</b>  | <b>motif</b>                                 | <b>N</b> | <b>B</b> | <b>n</b> | <b>b</b> | <b>p-value ≤</b> | <b>corrected p-value ≤</b> |
|------------|----------------------------------------------|----------|----------|----------|----------|------------------|----------------------------|
| A1 (MATA1) | ATAA-[0, 2, 3, 6, 7, 9]-TATT                 | 5615     | 1232     | 1846     | 520      | 5.64E-12         | 7.57E-04                   |
| A1 (MATA1) | AATGAA                                       | 5615     | 1589     | 4822     | 1451     | 2.21E-11         | 2.97E-03                   |
| ABF1       | TCGT-[6]-TGAT                                | 6057     | 159      | 1045     | 124      | 3.53E-63         | 4.74E-55                   |
| ABF1       | ATCA-[6]-ACGA                                | 6057     | 151      | 1043     | 120      | 7.23E-63         | 9.70E-55                   |
| ABT1       | ATTT-[0, 1, 2, 4, 6, 7, 8, 9, 10]-AAAT       | 6100     | 2059     | 3117     | 1239     | 4.49E-21         | 6.03E-13                   |
| ABT1       | AATA-[0, 1, 2, 3, 4, 5, 6, 7, 8, 9, 10]-TTTA | 6100     | 2091     | 3399     | 1349     | 1.42E-20         | 1.91E-12                   |
| ACA1       | AACA-[1, 4, 6]-TTCG                          | 6041     | 136      | 891      | 51       | 4.34E-09         | 5.83E-01                   |
| ACA1       | TGCT-[2, 4, 5, 6, 8, 10]-AGCA                | 6041     | 251      | 3072     | 178      | 8.30E-09         | 1.00E+00                   |
| ACE2       | CACA-[4, 6, 7, 9, 10]-CACA                   | 6148     | 257      | 160      | 30       | 4.68E-10         | 6.28E-02                   |
| ACE2       | ACAC-[0, 6, 7, 8, 9]-ACAC                    | 6148     | 198      | 390      | 41       | 1.13E-09         | 1.52E-01                   |
| ADR1       | ACTT-[2, 3, 6, 9, 10]-TGAC                   | 6167     | 208      | 2663     | 135      | 2.41E-08         | 1.00E+00                   |
| ADR1       | AGAT-[0, 1, 3, 4, 5, 10]-CAAC                | 6167     | 289      | 665      | 68       | 4.38E-08         | 1.00E+00                   |
| AFT2       | TATCCACGA                                    | 5921     | 19       | 420      | 17       | 6.11E-17         | 8.20E-09                   |
| AFT2       | AGATACTGTG                                   | 5921     | 16       | 420      | 15       | 1.10E-15         | 1.48E-07                   |
| ARG80      | ATTT-[1, 2, 4, 7, 8, 9, 10]-AAAT             | 6128     | 1783     | 2701     | 975      | 1.35E-23         | 1.81E-15                   |
| ARG80      | AAAT-[0, 1, 3, 5, 6, 7, 8, 9, 10]-AATT       | 6128     | 2042     | 3319     | 1300     | 3.81E-23         | 5.11E-15                   |
| ARG81      | AATT-[2, 5, 6, 7, 10]-ATAT                   | 6115     | 1111     | 2550     | 601      | 2.63E-17         | 3.53E-09                   |
| ARG81      | TATT-[0, 1, 2, 3, 4, 5, 6, 7, 8, 9]-TAAT     | 6115     | 1781     | 2350     | 842      | 1.49E-16         | 2.00E-08                   |
| ARO80      | ATTT-[0, 2, 3, 4, 6, 8, 9, 10]-AATA          | 6104     | 1737     | 3031     | 1000     | 6.21E-12         | 8.33E-04                   |
| ARO80      | TAAT-[2, 3, 4, 6, 7, 8, 9]-TTTA              | 6104     | 1330     | 3441     | 869      | 4.87E-11         | 6.54E-03                   |
| ARR1       | ATTT-[0, 3, 4, 5, 6, 8, 9, 10]-TTAT          | 6153     | 2080     | 2288     | 961      | 3.40E-22         | 4.56E-14                   |
| ARR1       | ATAT-[1, 3, 5, 6, 7, 8, 9, 10]-TAAT          | 6153     | 1552     | 2210     | 722      | 2.31E-20         | 3.10E-12                   |
| ASH1       | GGTC-[9]-GCGG                                | 6156     | 17       | 386      | 15       | 1.45E-15         | 1.95E-07                   |
| ASH1       | CTCCTCGAC                                    | 6156     | 17       | 386      | 15       | 1.45E-15         | 1.95E-07                   |
| ASK10      | AAAT-[1, 2, 3, 4, 5, 6, 8, 9]-TCAA           | 6126     | 1559     | 3568     | 1052     | 5.48E-15         | 7.36E-07                   |
| ASK10      | TGAT-[0, 3, 4, 5, 6, 7, 8, 9]-TCAA           | 6126     | 684      | 3678     | 511      | 7.34E-15         | 9.85E-07                   |
| AZF1       | AAATCACTTC                                   | 6137     | 6        | 3        | 3        | 3.12E-09         | 4.19E-01                   |
| AZF1       | ACAGCTGTA                                    | 6137     | 7        | 5        | 3        | 6.36E-08         | 1.00E+00                   |
| BAS1       | TAAT-[2, 3, 4, 5, 6, 7, 8, 9]-TTTA           | 6096     | 1455     | 5034     | 1293     | 4.87E-11         | 6.54E-03                   |
| BAS1       | ATTT-[1, 5, 7, 9, 10]-TATT                   | 6096     | 1511     | 3684     | 1028     | 1.93E-09         | 2.59E-01                   |

|       |                                     |      |      |      |      |          |          |
|-------|-------------------------------------|------|------|------|------|----------|----------|
| BYE1  | AATT-[2, 3, 5, 6, 7, 10]-AATT       | 6127 | 1184 | 2792 | 676  | 6.80E-16 | 9.13E-08 |
| BYE1  | TATT-[2, 3, 5, 6, 10]-ATGT          | 6127 | 645  | 3699 | 478  | 4.98E-12 | 6.68E-04 |
| CAD1  | ATCC-[0, 10]-CCAC                   | 6092 | 65   | 677  | 35   | 1.35E-15 | 1.81E-07 |
| CAD1  | CCAC-[3, 6]-GCGG                    | 6092 | 47   | 639  | 28   | 1.04E-14 | 1.40E-06 |
| CBF1  | CACGTG                              | 6090 | 372  | 263  | 119  | 9.79E-77 | 1.31E-68 |
| CBF1  | CACGTGA                             | 6090 | 180  | 233  | 77   | 1.37E-62 | 1.84E-54 |
| CHA4  | ATTT-[1, 2, 3, 6, 7, 8, 10]-AAAA    | 5821 | 1875 | 2312 | 902  | 3.35E-16 | 4.50E-08 |
| CHA4  | ATTT-[1, 2, 3, 7, 8, 9, 10]-AAAT    | 5821 | 1665 | 1819 | 655  | 8.35E-14 | 1.12E-05 |
| CIN5  | TTAC-[1]-TAAT                       | 6135 | 131  | 590  | 54   | 3.77E-20 | 5.06E-12 |
| CIN5  | ATTA-[1]-GTAA                       | 6135 | 128  | 439  | 46   | 1.84E-19 | 2.47E-11 |
| CRZ1  | CCTCGACTAA                          | 6103 | 22   | 359  | 17   | 3.71E-16 | 4.98E-08 |
| CRZ1  | CTCGACTAA                           | 6103 | 22   | 359  | 17   | 3.71E-16 | 4.98E-08 |
| CST6  | TGAA-[1, 3, 4, 6, 7, 8, 9, 10]-TTAA | 6182 | 977  | 2385 | 485  | 1.18E-11 | 1.58E-03 |
| CST6  | TAAA-[3, 5, 6, 9, 10]-TTAA          | 6182 | 912  | 1472 | 308  | 7.91E-11 | 1.06E-02 |
| CUP9  | GAGG-[1, 2, 6, 9]-CGTA              | 6059 | 111  | 3890 | 102  | 1.06E-09 | 1.42E-01 |
| CUP9  | CATC-[0, 9]-TACT                    | 6059 | 155  | 2043 | 92   | 5.14E-09 | 6.90E-01 |
| DAL80 | TTCA-[0, 1, 6, 8]-AATG              | 5527 | 360  | 410  | 68   | 3.70E-11 | 4.97E-03 |
| DAL80 | ATTAAA                              | 5527 | 1584 | 877  | 342  | 5.88E-10 | 7.89E-02 |
| DAL81 | TCCT-[2, 5, 7]-AGGA                 | 5953 | 211  | 1174 | 95   | 3.54E-15 | 4.75E-07 |
| DAL81 | GGAT-[1, 2]-CCTA                    | 5953 | 115  | 1257 | 60   | 1.41E-11 | 1.89E-03 |
| DAL82 | GATA-[3, 4, 5, 6, 7, 9]-CTCA        | 6045 | 242  | 937  | 76   | 4.40E-08 | 1.00E+00 |
| DAL82 | CAGG-[1, 3, 7]-TATA                 | 6045 | 127  | 854  | 45   | 1.22E-07 | 1.00E+00 |
| DAT1  | CTGAGCAACG                          | 6126 | 15   | 173  | 12   | 1.12E-15 | 1.50E-07 |
| DAT1  | CGGCTGAGCA                          | 6126 | 15   | 173  | 12   | 1.12E-15 | 1.50E-07 |
| DIG1  | CTGTATACCT                          | 6096 | 62   | 794  | 42   | 1.08E-21 | 1.45E-13 |
| DIG1  | CTGT-[3]-CCTA                       | 6096 | 70   | 809  | 45   | 1.91E-21 | 2.56E-13 |
| DOT6  | CGGC-[0, 2, 3, 7, 8, 10]-GCCG       | 6003 | 80   | 2385 | 63   | 7.09E-11 | 9.52E-03 |
| DOT6  | ACGA-[7, 9]-CGTG                    | 6003 | 32   | 1243 | 24   | 1.91E-09 | 2.56E-01 |
| ECM22 | CACA-[4, 5, 6]-CGCA                 | 6084 | 87   | 3138 | 78   | 1.93E-12 | 2.59E-04 |
| ECM22 | GCAG-[0, 1, 2, 3, 4, 5, 8, 10]-CGGC | 6084 | 115  | 1641 | 67   | 1.21E-10 | 1.62E-02 |
| EDS1  | ATTA-[5, 9, 10]-TTCA                | 6115 | 418  | 2215 | 218  | 1.74E-09 | 2.34E-01 |
| EDS1  | AAGA-[0, 1, 3, 4, 6, 8, 9]-CTAT     | 6115 | 558  | 735  | 120  | 9.45E-09 | 1.00E+00 |
| FAP7  | TAAG-[0, 1, 3, 5, 9]-TTTT           | 6172 | 692  | 4728 | 594  | 8.13E-08 | 1.00E+00 |
| FAP7  | TAAA-[3, 4, 5, 6, 9, 10]-TTTA       | 6172 | 1239 | 4840 | 1052 | 1.20E-07 | 1.00E+00 |

|       |                                           |      |      |      |      |          |          |
|-------|-------------------------------------------|------|------|------|------|----------|----------|
| FHL1  | ATCC-[2]-ACAT                             | 6076 | 79   | 182  | 40   | 2.16E-39 | 2.90E-31 |
| FHL1  | ATCC-[1]-TACA                             | 6076 | 74   | 182  | 39   | 2.73E-39 | 3.66E-31 |
| FKH1  | TGTTTAC                                   | 6169 | 290  | 593  | 86   | 9.19E-21 | 1.23E-12 |
| FKH1  | TTGT-[0]-TTAC                             | 6169 | 128  | 308  | 39   | 4.59E-19 | 6.16E-11 |
| FKH2  | GTAACA                                    | 6164 | 358  | 596  | 88   | 4.62E-15 | 6.20E-07 |
| FKH2  | TTGTTTAC                                  | 6164 | 129  | 477  | 42   | 1.52E-14 | 2.04E-06 |
| FZF1  | AAAT-[0, 1, 5, 6, 7, 9, 10]-ATTT          | 6104 | 1964 | 2029 | 790  | 2.94E-12 | 3.95E-04 |
| FZF1  | TATT-[0, 1, 2, 3, 4, 6, 9]-AAAT           | 6104 | 1480 | 3038 | 855  | 1.30E-09 | 1.74E-01 |
| GAL3  | TAAT-[0, 3, 7, 8, 10]-ACTT                | 6118 | 533  | 3123 | 353  | 4.92E-11 | 6.60E-03 |
| GAL3  | TGAA-[1, 2, 4, 5, 6, 7]-TCAA              | 6118 | 795  | 1720 | 313  | 9.56E-11 | 1.28E-02 |
| GAL4  | CGGA-[10]-CCGT                            | 6157 | 13   | 6    | 4    | 2.33E-09 | 3.13E-01 |
| GAL4  | ATCA-[1, 10]-GTTA                         | 6157 | 113  | 20   | 9    | 2.75E-09 | 3.69E-01 |
| GAL80 | AAAT-[0, 1, 2, 3, 4, 5, 6, 7, 9, 10]-TCAA | 6156 | 1805 | 3138 | 1060 | 4.63E-12 | 6.21E-04 |
| GAL80 | TTGA-[0, 2, 5, 6, 8, 9]-ATCA              | 6156 | 524  | 3340 | 359  | 1.39E-09 | 1.87E-01 |
| GAT1  | CCAC-[0, 1, 3, 4, 5, 6, 7, 8, 9, 10]-CCAG | 6172 | 175  | 1947 | 112  | 6.31E-17 | 8.47E-09 |
| GAT1  | CGGCGC                                    | 6172 | 220  | 2291 | 141  | 3.07E-14 | 4.12E-06 |
| GAT3  | GCGG-[7, 10]-ACGA                         | 6069 | 51   | 54   | 23   | 2.49E-34 | 3.34E-26 |
| GAT3  | CACG-[5, 8]-GAGC                          | 6069 | 51   | 49   | 21   | 3.78E-31 | 5.07E-23 |
| GCN4  | TGACTCA                                   | 6176 | 140  | 225  | 46   | 1.15E-30 | 1.54E-22 |
| GCN4  | ATGACTCA                                  | 6176 | 38   | 244  | 22   | 2.52E-20 | 3.38E-12 |
| GCR1  | CCATTTTGAG                                | 6121 | 48   | 206  | 20   | 4.86E-16 | 6.52E-08 |
| GCR1  | ATTCCATTTT                                | 6121 | 66   | 149  | 20   | 1.52E-15 | 2.04E-07 |
| GCR2  | AAAT-[0, 1, 4, 6, 9, 10]-TCAT             | 6121 | 946  | 4678 | 814  | 1.27E-12 | 1.70E-04 |
| GCR2  | TAAA-[1, 2, 4, 8, 9, 10]-TTTA             | 6121 | 1157 | 2428 | 573  | 3.18E-11 | 4.27E-03 |
| GLN3  | AAAT-[1, 2, 3, 4, 5, 6, 9]-ATTT           | 6132 | 1857 | 4956 | 1627 | 4.97E-17 | 6.67E-09 |
| GLN3  | TAAA-[0, 1, 2, 3, 4, 5, 7, 8, 10]-TATT    | 6132 | 1805 | 5028 | 1598 | 6.84E-16 | 9.18E-08 |
| GTS1  | ATAA-[0, 2, 5, 7, 10]-AAGT                | 6142 | 745  | 5361 | 701  | 5.78E-08 | 1.00E+00 |
| GTS1  | CATA-[2, 3]-GCCA                          | 6142 | 64   | 2360 | 48   | 1.59E-07 | 1.00E+00 |
| GZF3  | ATGA-[1, 2, 3, 4, 6, 8]-AACA              | 5935 | 479  | 2158 | 242  | 1.34E-08 | 1.00E+00 |
| GZF3  | CTGA-[0, 1, 3, 4, 7, 9, 10]-TGAT          | 5935 | 320  | 2389 | 185  | 1.78E-08 | 1.00E+00 |
| HAA1  | CAAA-[0, 3, 5, 6, 7, 8, 9]-TTGA           | 5846 | 768  | 5167 | 733  | 3.02E-10 | 4.05E-02 |
| HAA1  | ATGAAG                                    | 5846 | 964  | 4092 | 766  | 3.30E-10 | 4.43E-02 |
| HAC1  | AAAT-[0, 3, 4, 5, 7, 8, 9, 10]-TAAA       | 6178 | 2179 | 2195 | 916  | 5.51E-12 | 7.40E-04 |
| HAC1  | AAAA-[1, 2, 4, 5, 7, 8, 9, 10]-AAAT       | 6178 | 2983 | 3702 | 1937 | 1.34E-11 | 1.80E-03 |

|      |                                           |      |      |      |      |          |          |
|------|-------------------------------------------|------|------|------|------|----------|----------|
| HAL9 | TGTT-[1]-GAAT                             | 6126 | 144  | 2402 | 108  | 1.64E-16 | 2.20E-08 |
| HAL9 | AATT-[2, 3, 6, 7, 9, 10]-AATT             | 6126 | 1182 | 2239 | 566  | 4.49E-16 | 6.03E-08 |
| HAP1 | TTTATCGG                                  | 6119 | 30   | 188  | 18   | 4.96E-19 | 6.66E-11 |
| HAP1 | TTTA-[0]-TCGG                             | 6119 | 30   | 188  | 18   | 4.96E-19 | 6.66E-11 |
| HAP2 | AATATT                                    | 6072 | 2327 | 1138 | 535  | 4.82E-08 | 1.00E+00 |
| HAP2 | GTTA-[2, 4, 8]-AGAT                       | 6072 | 217  | 533  | 48   | 1.88E-07 | 1.00E+00 |
| HAP3 | AAAT-[0, 2, 4, 6, 7, 9, 10]-TTTA          | 6154 | 1555 | 3714 | 1087 | 2.01E-16 | 2.70E-08 |
| HAP3 | ATTT-[0, 2, 4, 5, 8, 9]-AATA              | 6154 | 1398 | 2459 | 695  | 3.57E-14 | 4.79E-06 |
| HAP4 | CACG-[6, 8]-GAGC                          | 6115 | 36   | 242  | 19   | 1.89E-16 | 2.54E-08 |
| HAP4 | GACTAAGCA                                 | 6115 | 20   | 443  | 17   | 5.80E-16 | 7.78E-08 |
| HAP5 | TATT-[1, 2, 4, 5, 7, 8, 9, 10]-AATA       | 6115 | 1676 | 1842 | 638  | 2.27E-13 | 3.05E-05 |
| HAP5 | ATAT-[0, 1, 2, 3, 6, 8, 10]-TTTA          | 6115 | 1596 | 2813 | 865  | 2.27E-11 | 3.05E-03 |
| HIR1 | ATTT-[1, 2, 5, 6, 8, 9]-ATTT              | 6089 | 1898 | 934  | 407  | 4.57E-15 | 6.13E-07 |
| HIR1 | AATTTT                                    | 6089 | 2909 | 2086 | 1136 | 8.51E-11 | 1.14E-02 |
| HIR2 | ATAT-[0, 1, 3, 4, 5, 10]-ATAT             | 6047 | 1895 | 3326 | 1240 | 1.79E-25 | 2.40E-17 |
| HIR2 | TATA-[0, 1, 2, 5, 9]-TATA                 | 6047 | 1676 | 3032 | 1028 | 3.24E-24 | 4.35E-16 |
| HIR3 | TTTT-[0, 1, 2, 3, 4, 5, 6, 7, 8, 10]-AAAA | 6176 | 2367 | 3873 | 1687 | 3.11E-25 | 4.17E-17 |
| HIR3 | AAAT-[0, 4, 5, 6, 7, 8, 9, 10]-ATTT       | 6176 | 2218 | 4557 | 1816 | 4.12E-25 | 5.53E-17 |
| HMS1 | ATTT-[0, 5, 7, 10]-TTTT                   | 6018 | 2439 | 1963 | 943  | 2.91E-13 | 3.91E-05 |
| HMS1 | AAAT-[0, 2, 5, 7, 9]-ATTT                 | 6018 | 1486 | 4032 | 1120 | 8.24E-13 | 1.11E-04 |
| HMS2 | TGTA-[2, 6]-TTTT                          | 6038 | 524  | 368  | 70   | 4.47E-08 | 1.00E+00 |
| HMS2 | TTAA-[0, 1, 8]-TTAC                       | 6038 | 281  | 857  | 77   | 6.29E-07 | 1.00E+00 |
| HOG1 | TTTA-[0, 1, 3, 4, 5, 6, 7, 8, 9]-AAAT     | 6041 | 1851 | 3320 | 1208 | 5.95E-24 | 7.99E-16 |
| HOG1 | ATTT-[0, 2, 4, 5, 6, 7, 9, 10]-AATT       | 6041 | 1792 | 3511 | 1224 | 8.54E-23 | 1.15E-14 |
| HSF1 | AATG-[0, 1, 2, 5]-CATT                    | 6155 | 354  | 54   | 18   | 1.58E-07 | 1.00E+00 |
| HSF1 | TAAA-[0, 5]-ATCA                          | 6155 | 267  | 2028 | 135  | 2.40E-07 | 1.00E+00 |
| IFH1 | TCAC-[6, 8, 9]-AATT                       | 6140 | 273  | 24   | 13   | 8.81E-10 | 1.18E-01 |
| IFH1 | ATTT-[0, 1, 2, 3, 8]-GAAC                 | 6140 | 437  | 1688 | 180  | 4.27E-08 | 1.00E+00 |
| IME1 | ATCC-[3, 6, 10]-TCGT                      | 4899 | 85   | 438  | 29   | 5.38E-09 | 7.22E-01 |
| IME1 | CAGC-[0, 8, 9, 10]-ACCG                   | 4899 | 50   | 2713 | 47   | 6.99E-08 | 1.00E+00 |
| IME4 | CACA-[1, 2]-CACA                          | 5841 | 144  | 302  | 33   | 1.92E-11 | 2.58E-03 |
| IME4 | ACACACACAC                                | 5841 | 29   | 80   | 10   | 6.14E-11 | 8.24E-03 |
| INO2 | CATGTG                                    | 5974 | 420  | 431  | 83   | 5.50E-16 | 7.38E-08 |
| INO2 | GCATGTG                                   | 5974 | 110  | 429  | 36   | 1.65E-13 | 2.21E-05 |

|       |                                       |      |      |      |      |          |          |
|-------|---------------------------------------|------|------|------|------|----------|----------|
| INO4  | CACGTG                                | 6089 | 368  | 2954 | 274  | 4.64E-23 | 6.23E-15 |
| INO4  | CATGTGAA                              | 6089 | 50   | 57   | 15   | 4.48E-18 | 6.01E-10 |
| IXR1  | AAAT-[2, 3, 4, 5, 7, 8, 9]-CTCA       | 5995 | 570  | 2059 | 272  | 1.69E-09 | 2.27E-01 |
| IXR1  | CATC-[3, 5]-AATC                      | 5995 | 115  | 138  | 18   | 8.91E-09 | 1.00E+00 |
| KRE33 | AATG-[9]-CAAC                         | 5996 | 58   | 476  | 20   | 4.16E-07 | 1.00E+00 |
| KRE33 | AGAA-[0, 1, 5, 8]-CTGA                | 5996 | 283  | 1477 | 113  | 1.20E-06 | 1.00E+00 |
| KSS1  | TATT-[0, 1, 2, 4, 5, 6, 7]-GCTG       | 6118 | 411  | 2755 | 256  | 1.07E-10 | 1.44E-02 |
| KSS1  | ATAT-[0, 1, 2]-CAGC                   | 6118 | 207  | 3953 | 174  | 4.57E-08 | 1.00E+00 |
| LEU3  | TAAT-[1, 2, 6, 7, 9, 10]-TTAG         | 6129 | 566  | 1400 | 205  | 1.34E-11 | 1.80E-03 |
| LEU3  | ACCC-[2, 8]-ACAT                      | 6129 | 105  | 589  | 36   | 2.64E-10 | 3.54E-02 |
| MAC1  | CCTA-[1, 9]-GACT                      | 6112 | 30   | 520  | 15   | 1.02E-07 | 1.00E+00 |
| MAC1  | CCTATGACT                             | 6112 | 9    | 509  | 8    | 1.65E-07 | 1.00E+00 |
| MAL13 | CCTCGACTAA                            | 5514 | 22   | 626  | 19   | 2.12E-14 | 2.85E-06 |
| MAL13 | CTCGACTAA                             | 5514 | 22   | 626  | 19   | 2.12E-14 | 2.85E-06 |
| MAL33 | GCTT-[3, 4, 10]-CCAC                  | 6055 | 86   | 1268 | 48   | 8.71E-11 | 1.17E-02 |
| MAL33 | CACA-[0, 1, 2, 3, 4, 5, 6]-CACA       | 6055 | 344  | 3043 | 236  | 3.51E-10 | 4.71E-02 |
| MBF1  | TCAT-[6]-CTGT                         | 3394 | 33   | 181  | 13   | 1.37E-07 | 1.00E+00 |
| MBF1  | GTAA-[1, 7, 9]-TAAG                   | 3394 | 92   | 1632 | 72   | 1.65E-07 | 1.00E+00 |
| MBP1  | ACGCGT                                | 6169 | 326  | 1067 | 166  | 2.97E-44 | 3.99E-36 |
| MBP1  | CGCG-[1, 3, 6, 8, 9, 10]-CGCG         | 6169 | 92   | 434  | 50   | 2.76E-32 | 3.70E-24 |
| MCM1  | AAAT-[0, 1, 2, 4, 7, 9, 10]-ATTT      | 6184 | 1921 | 3403 | 1222 | 6.73E-17 | 9.03E-09 |
| MCM1  | AATA-[0, 1, 3, 4, 7, 9]-TAAT          | 6184 | 1307 | 2974 | 759  | 3.39E-13 | 4.55E-05 |
| MDS3  | ATTT-[1, 2, 4, 5, 7, 8, 9, 10]-AAAT   | 6180 | 1985 | 2001 | 816  | 2.11E-20 | 2.83E-12 |
| MDS3  | AAAT-[0, 1, 2, 3, 4, 5, 6, 7, 9]-TCAA | 6180 | 1708 | 3987 | 1261 | 8.70E-19 | 1.17E-10 |
| MET18 | GTATCCAAGA                            | 6091 | 17   | 248  | 12   | 1.40E-12 | 1.88E-04 |
| MET18 | CGAACAGAAT                            | 6091 | 16   | 248  | 11   | 2.39E-11 | 3.21E-03 |
| MET28 | ATAA-[0, 3, 4, 6, 7]-TTAT             | 6026 | 937  | 670  | 169  | 3.11E-09 | 4.17E-01 |
| MET28 | GGTC-[2, 10]-TTTA                     | 6026 | 73   | 342  | 21   | 1.96E-08 | 1.00E+00 |
| MET31 | ATCC-[0, 5, 7, 10]-GTAC               | 6112 | 112  | 1121 | 50   | 1.02E-08 | 1.00E+00 |
| MET31 | AGTA-[4, 5, 10]-ATTA                  | 6112 | 340  | 2316 | 187  | 1.17E-08 | 1.00E+00 |
| MET32 | CACGTGA                               | 6070 | 176  | 46   | 14   | 3.33E-09 | 4.47E-01 |
| MET32 | CACGTG                                | 6070 | 365  | 24   | 13   | 5.43E-08 | 1.00E+00 |
| MET4  | CACGTG                                | 6079 | 368  | 2755 | 240  | 6.90E-13 | 9.26E-05 |
| MET4  | CCAC-[0, 2, 4, 6, 10]-GTGG            | 6079 | 79   | 18   | 9    | 2.32E-11 | 3.11E-03 |



|       |                                        |      |      |      |      |          |          |
|-------|----------------------------------------|------|------|------|------|----------|----------|
| MGA1  | TTAA-[0, 2, 4, 5, 6, 7, 9]-AAGT        | 6114 | 791  | 699  | 155  | 2.97E-10 | 3.99E-02 |
| MGA1  | TTAA-[1, 2, 5, 7, 9, 10]-TTGA          | 6114 | 701  | 2405 | 363  | 6.18E-10 | 8.29E-02 |
| MIG1  | CCTA-[1, 2, 8]-AGCT                    | 6116 | 62   | 80   | 12   | 8.50E-10 | 1.14E-01 |
| MIG1  | ATAC-[3, 9]-CGGA                       | 6116 | 30   | 75   | 9    | 1.34E-09 | 1.80E-01 |
| MIG2  | ATTT-[0, 1, 4, 5, 6, 7, 8, 9, 10]-AAAT | 6063 | 2035 | 1073 | 473  | 3.29E-12 | 4.42E-04 |
| MIG2  | ATAT-[4, 5, 7, 8, 10]-TAAT             | 6063 | 1098 | 2318 | 527  | 2.20E-10 | 2.95E-02 |
| MIG3  | AAAT-[3, 5, 6, 7, 8, 9, 10]-AATT       | 6180 | 1764 | 2742 | 959  | 2.24E-20 | 3.01E-12 |
| MIG3  | AAAT-[0, 1, 2, 3, 4, 6, 8, 9, 10]-AAAA | 6180 | 2935 | 2818 | 1514 | 4.49E-16 | 6.03E-08 |
| MOT3  | ATAT-[0, 2, 4, 5, 6, 9]-TATA           | 5811 | 1624 | 3031 | 1005 | 1.80E-17 | 2.42E-09 |
| MOT3  | ATATTATCAT                             | 5811 | 91   | 655  | 41   | 2.15E-14 | 2.89E-06 |
| MSN1  | GCCT-[4, 5]-CAAC                       | 6088 | 105  | 3109 | 89   | 3.04E-11 | 4.08E-03 |
| MSN1  | GCGA-[2, 7, 8, 9]-TCGC                 | 6088 | 58   | 780  | 29   | 3.59E-10 | 4.82E-02 |
| MSN2  | ATAA-[0, 1, 4, 5, 8]-AATA              | 6171 | 1432 | 1328 | 400  | 3.79E-08 | 1.00E+00 |
| MSN2  | ATGT-[5, 6, 10]-GTGG                   | 6171 | 73   | 21   | 7    | 1.80E-07 | 1.00E+00 |
| MSN4  | GCGG-[7, 10]-ACGA                      | 6182 | 53   | 169  | 20   | 8.63E-17 | 1.16E-08 |
| MSN4  | CGTAGGTCCA                             | 6182 | 15   | 166  | 12   | 6.02E-16 | 8.08E-08 |
| MSS11 | ATTT-[0, 3, 9, 10]-TCAA                | 5644 | 763  | 3930 | 612  | 8.28E-10 | 1.11E-01 |
| MSS11 | ATTA-[0, 1, 4, 5, 8, 9]-TTAT           | 5644 | 982  | 3573 | 710  | 3.84E-08 | 1.00E+00 |
| MTH1  | CCAC-[0, 2, 3, 5, 7, 10]-CGGC          | 5975 | 77   | 1765 | 53   | 6.85E-11 | 9.19E-03 |
| MTH1  | CCCT-[1, 7, 8, 10]-GGAG                | 5975 | 55   | 730  | 28   | 1.38E-10 | 1.85E-02 |
| NDD1  | GTCT-[1, 3, 4]-GCGG                    | 6181 | 33   | 798  | 20   | 4.81E-09 | 6.46E-01 |
| NDD1  | GTCT-[2, 4, 5, 6, 10]-CGGA             | 6181 | 68   | 521  | 24   | 2.97E-08 | 1.00E+00 |
| NDT80 | TAAT-[0, 1, 9]-TATT                    | 6032 | 621  | 367  | 77   | 1.81E-07 | 1.00E+00 |
| NDT80 | TGCT-[2, 3, 6, 9]-TGAG                 | 6032 | 134  | 1800 | 73   | 2.17E-07 | 1.00E+00 |
| NNF2  | ATTT-[1, 3, 5, 6, 7, 8, 10]-TAAT       | 5997 | 1329 | 3350 | 880  | 3.10E-15 | 4.16E-07 |
| NNF2  | TTAT-[2, 3, 5, 10]-AAAT                | 5997 | 834  | 3444 | 585  | 2.39E-13 | 3.21E-05 |
| NRG1  | GGGG-[1, 2]-TGCT                       | 6096 | 13   | 34   | 6    | 4.10E-10 | 5.50E-02 |
| NRG1  | ATGT-[0, 4, 5, 6]-TGTG                 | 6096 | 195  | 113  | 22   | 8.95E-10 | 1.20E-01 |
| OAF1  | GTTC-[0, 4, 6, 8]-GAGC                 | 6052 | 94   | 767  | 39   | 1.70E-10 | 2.28E-02 |
| OAF1  | ACGA-[0, 1, 2, 4, 5, 10]-TCGT          | 6052 | 142  | 431  | 36   | 9.59E-10 | 1.29E-01 |
| OPI1  | GCATGTGAA                              | 6181 | 13   | 157  | 8    | 2.18E-09 | 2.93E-01 |
| OPI1  | CTAG-[1, 3]-ATTC                       | 6181 | 139  | 140  | 20   | 3.28E-09 | 4.40E-01 |
| PDC2  | TGTTGGAATA                             | 6120 | 83   | 404  | 51   | 3.52E-38 | 4.72E-30 |
| PDC2  | CATATACGGT                             | 6120 | 78   | 404  | 49   | 2.50E-37 | 3.36E-29 |

|      |                                        |      |      |      |      |          |          |
|------|----------------------------------------|------|------|------|------|----------|----------|
| PDR1 | AGATACTGTG                             | 6136 | 16   | 161  | 13   | 1.44E-17 | 1.93E-09 |
| PDR1 | TCTCCTCGAC                             | 6136 | 16   | 161  | 13   | 1.44E-17 | 1.93E-09 |
| PDR3 | TTGA-[4, 5, 6, 10]-TCAA                | 5957 | 436  | 1356 | 162  | 5.05E-10 | 6.78E-02 |
| PDR3 | AATG-[0, 4, 6, 8, 9, 10]-ATCA          | 5957 | 427  | 2771 | 265  | 6.76E-09 | 9.07E-01 |
| PHD1 | ATTT-[1, 3, 5, 9, 10]-TTTT             | 6104 | 2548 | 3782 | 1724 | 1.00E-11 | 1.34E-03 |
| PHD1 | ATTT-[0, 2, 3, 4, 6]-TTTC              | 6104 | 1764 | 3652 | 1181 | 3.47E-10 | 4.66E-02 |
| PHO2 | ATAT-[2, 5, 7, 9]-TAGT                 | 6143 | 504  | 2077 | 238  | 2.77E-08 | 1.00E+00 |
| PHO2 | TTTA-[0, 1, 7, 8, 9]-TAAA              | 6143 | 1123 | 2152 | 489  | 4.38E-08 | 1.00E+00 |
| PHO4 | TGACGATAG                              | 5995 | 9    | 244  | 7    | 5.14E-08 | 1.00E+00 |
| PHO4 | CACC-[0, 2, 3, 5, 9]-GCTT              | 5995 | 126  | 82   | 14   | 1.31E-07 | 1.00E+00 |
| PIP2 | TTGACCGAAA                             | 5537 | 12   | 608  | 11   | 3.35E-09 | 4.50E-01 |
| PIP2 | ACATGAGTGC                             | 5537 | 10   | 656  | 10   | 5.13E-09 | 6.89E-01 |
| PPR1 | GCAA-[0, 4, 6]-TTGC                    | 6042 | 162  | 9    | 7    | 4.88E-08 | 1.00E+00 |
| PPR1 | TCTA-[0, 4, 8, 10]-TAAC                | 6042 | 208  | 5008 | 201  | 8.14E-08 | 1.00E+00 |
| PUT3 | CGGG-[0, 2, 3, 8]-CCCG                 | 6032 | 31   | 1322 | 24   | 2.05E-09 | 2.75E-01 |
| PUT3 | CCGG-[1, 3, 6, 10]-TCGA                | 6032 | 57   | 613  | 25   | 2.29E-09 | 3.07E-01 |
| RAP1 | CCCA-[1]-ACAT                          | 5984 | 81   | 705  | 54   | 9.46E-30 | 1.27E-21 |
| RAP1 | ACCC-[2, 7]-ACAT                       | 5984 | 110  | 410  | 49   | 7.23E-27 | 9.70E-19 |
| RCO1 | AGTC-[0, 6]-AAAC                       | 5566 | 74   | 3886 | 72   | 9.47E-08 | 1.00E+00 |
| RCO1 | GAGA-[3]-TAAT                          | 5566 | 56   | 2885 | 50   | 1.19E-07 | 1.00E+00 |
| RCS1 | ATTT-[1, 2, 4, 6, 7, 8, 10]-AAAA       | 6045 | 2002 | 4341 | 1604 | 9.73E-22 | 1.31E-13 |
| RCS1 | ATTT-[0, 1, 2, 4, 7, 8, 9, 10]-AAAT    | 6045 | 1850 | 3279 | 1179 | 5.95E-20 | 7.99E-12 |
| RDR1 | ATTT-[0, 2, 3, 4, 7, 8, 9, 10]-AAAT    | 6076 | 1873 | 3804 | 1332 | 2.73E-17 | 3.66E-09 |
| RDR1 | TTAT-[0, 1, 2, 3, 5, 6, 10]-AAAT       | 6076 | 1312 | 3673 | 932  | 2.20E-16 | 2.95E-08 |
| RDS1 | TAAA-[0, 1, 2, 4, 5, 7, 8, 10]-TATT    | 6080 | 1631 | 3129 | 1035 | 5.36E-27 | 7.19E-19 |
| RDS1 | AATA-[0, 1, 2, 3, 4, 5, 7, 8, 10]-TTTA | 6080 | 1807 | 2830 | 1042 | 1.55E-26 | 2.08E-18 |
| REB1 | TTACCCG                                | 6174 | 312  | 747  | 171  | 1.72E-77 | 2.31E-69 |
| REB1 | CGGGTAA                                | 6174 | 298  | 611  | 149  | 1.58E-72 | 2.12E-64 |
| RFX1 | TATA-[1, 2, 3, 5, 9]-TTTA              | 5915 | 1096 | 2477 | 567  | 2.22E-10 | 2.98E-02 |
| RFX1 | TTTT-[1, 2, 3, 5, 8, 10]-AAAA          | 5915 | 1993 | 4560 | 1645 | 6.52E-10 | 8.75E-02 |
| RGM1 | CCTCGACTAA                             | 6050 | 22   | 315  | 22   | 6.27E-28 | 8.42E-20 |
| RGM1 | CTCGACTAA                              | 6050 | 22   | 315  | 22   | 6.27E-28 | 8.42E-20 |
| RGT1 | GGGG-[4, 5, 6, 7, 9, 10]-CCCC          | 6113 | 54   | 3084 | 51   | 1.01E-10 | 1.36E-02 |
| RGT1 | ACAT-[0, 2, 8]-CATC                    | 6113 | 208  | 5366 | 208  | 2.12E-10 | 2.85E-02 |

|        |                                        |      |      |      |      |          |          |
|--------|----------------------------------------|------|------|------|------|----------|----------|
| RIM101 | CTAT-[2, 3, 5, 8, 9]-AGTC              | 6146 | 139  | 3371 | 112  | 1.64E-08 | 1.00E+00 |
| RIM101 | GTAA-[1, 4, 8, 10]-ACTT                | 6146 | 290  | 2562 | 173  | 6.20E-08 | 1.00E+00 |
| RLM1   | TAAT-[0, 3]-ATCA                       | 6122 | 326  | 2549 | 201  | 1.97E-11 | 2.64E-03 |
| RLM1   | TACG-[2, 3]-GTTA                       | 6122 | 134  | 2524 | 94   | 9.98E-10 | 1.34E-01 |
| RLR1   | TTTA-[0, 1, 2, 3, 4, 5, 6, 7, 9]-AAAT  | 6097 | 1863 | 3378 | 1202 | 1.51E-18 | 2.03E-10 |
| RLR1   | ATAT-[0, 1, 3, 4, 5, 7, 8, 9, 10]-AATT | 6097 | 1651 | 1958 | 673  | 3.24E-15 | 4.35E-07 |
| RME1   | GGGC-[0, 3, 5, 8, 9]-GCCC              | 6176 | 55   | 1365 | 33   | 6.81E-08 | 1.00E+00 |
| RME1   | TCTC-[0, 5, 7, 9]-GATA                 | 6176 | 170  | 736  | 50   | 6.90E-08 | 1.00E+00 |
| ROX1   | TTTC-[0, 9]-TTTT                       | 6110 | 1572 | 1730 | 552  | 7.08E-09 | 9.50E-01 |
| ROX1   | ACCC-[1, 5, 7, 8, 10]-GGCG             | 6110 | 63   | 1289 | 36   | 2.32E-08 | 1.00E+00 |
| RPH1   | GGGG-[1]-TCGA                          | 6137 | 35   | 856  | 23   | 8.89E-11 | 1.19E-02 |
| RPH1   | ACCG-[1, 5, 8, 9, 10]-CCCC             | 6137 | 46   | 1012 | 28   | 5.47E-10 | 7.34E-02 |
| RPI1   | ATTT-[0, 1, 2, 4, 6, 7, 8, 10]-AAAT    | 6071 | 1826 | 1870 | 705  | 1.45E-14 | 1.95E-06 |
| RPI1   | AATT-[2, 4, 5, 7, 8, 10]-AATT          | 6071 | 1211 | 2183 | 554  | 3.43E-12 | 4.60E-04 |
| RPN4   | AATATT                                 | 5984 | 2282 | 2723 | 1218 | 1.23E-18 | 1.65E-10 |
| RPN4   | TAAT-[0, 5, 8]-ATTA                    | 5984 | 638  | 2900 | 416  | 1.05E-16 | 1.41E-08 |
| RTG1   | CTCT-[0, 1, 4]-AAAG                    | 6029 | 170  | 4418 | 157  | 3.08E-08 | 1.00E+00 |
| RTG1   | AAAA-[0, 2, 4, 8]-TGTT                 | 6029 | 670  | 861  | 154  | 5.58E-08 | 1.00E+00 |
| RTG3   | TGAT-[1, 3, 4, 5, 8]-ATCA              | 6043 | 381  | 1132 | 132  | 6.81E-12 | 9.14E-04 |
| RTG3   | AAAT-[0, 3, 4, 7, 8, 9, 10]-AATT       | 6043 | 1669 | 435  | 187  | 1.02E-09 | 1.37E-01 |
| RTS2   | TTGA-[1, 2, 6, 8]-TCAA                 | 5934 | 448  | 309  | 57   | 3.82E-08 | 1.00E+00 |
| RTS2   | ATTG-[0, 9]-GATA                       | 5934 | 141  | 2763 | 102  | 4.29E-08 | 1.00E+00 |
| SFL1   | TTGA-[1, 5, 10]-TATA                   | 5425 | 388  | 501  | 78   | 2.50E-09 | 3.36E-01 |
| SFL1   | TTTA-[0, 4, 5]-GATA                    | 5425 | 301  | 719  | 82   | 6.57E-09 | 8.82E-01 |
| SFP1   | ATGTATGGGT                             | 6145 | 17   | 467  | 11   | 6.03E-08 | 1.00E+00 |
| SFP1   | ACCCATACAT                             | 6145 | 20   | 381  | 11   | 9.15E-08 | 1.00E+00 |
| SIG1   | ATCG-[0, 8]-CGAT                       | 5977 | 65   | 1043 | 34   | 8.79E-09 | 1.00E+00 |
| SIG1   | ATCGCGAT                               | 5977 | 37   | 647  | 19   | 3.49E-08 | 1.00E+00 |
| SIP3   | AAAT-[1, 2, 3, 4, 5, 6, 7, 9]-TCAA     | 6053 | 1527 | 4320 | 1214 | 9.25E-14 | 1.24E-05 |
| SIP3   | TTGA-[1, 5, 7, 8]-TCAA                 | 6053 | 497  | 4504 | 437  | 4.23E-12 | 5.68E-04 |
| SIP4   | ACAG-[2, 4, 7]-TCGG                    | 6051 | 51   | 3701 | 51   | 5.76E-10 | 7.73E-02 |
| SIP4   | TTTG-[4, 6, 9]-TGGA                    | 6051 | 233  | 2715 | 149  | 4.25E-07 | 1.00E+00 |
| SKN7   | GGCC-[0, 1, 2, 3, 6, 8, 9, 10]-GGCC    | 6156 | 97   | 3065 | 85   | 2.39E-13 | 3.21E-05 |
| SKN7   | GGGC-[0, 1, 3, 7, 8, 9]-CCCC           | 6156 | 36   | 310  | 16   | 1.23E-10 | 1.65E-02 |

|       |                                        |      |      |      |      |          |          |
|-------|----------------------------------------|------|------|------|------|----------|----------|
| SKO1  | ATCCACGAA                              | 5749 | 20   | 875  | 19   | 8.49E-14 | 1.14E-05 |
| SKO1  | ATGACGT                                | 5749 | 113  | 621  | 44   | 3.01E-13 | 4.04E-05 |
| SMK1  | TCAA-[0, 1, 4, 5, 8, 9, 10]-AATG       | 5983 | 679  | 2732 | 386  | 2.44E-07 | 1.00E+00 |
| SMK1  | CAGGCTCTA                              | 5983 | 9    | 870  | 9    | 2.52E-07 | 1.00E+00 |
| SMP1  | GACTAAGCA                              | 6136 | 20   | 507  | 16   | 2.68E-13 | 3.60E-05 |
| SMP1  | CGACTAAGCA                             | 6136 | 18   | 507  | 15   | 5.47E-13 | 7.34E-05 |
| SNF1  | CTGA-[0, 5, 7, 8]-TTGA                 | 6166 | 220  | 4278 | 198  | 2.40E-11 | 3.22E-03 |
| SNF1  | GATTC A                                | 6166 | 727  | 4292 | 589  | 7.06E-11 | 9.48E-03 |
| SNT2  | TGATAGCGCC                             | 6168 | 9    | 36   | 8    | 4.72E-17 | 6.34E-09 |
| SNT2  | TCCT-[3, 4, 6, 7, 9]-AGGA              | 6168 | 282  | 1390 | 129  | 2.49E-16 | 3.34E-08 |
| SOK2  | TATG-[1, 5]-GTTG                       | 5842 | 95   | 118  | 15   | 4.19E-08 | 1.00E+00 |
| SOK2  | ATCA-[1, 4, 9]-TGCA                    | 5842 | 157  | 172  | 22   | 1.08E-07 | 1.00E+00 |
| SPT10 | ATTT-[2, 3, 4, 5, 6, 7, 8, 9, 10]-AAAT | 6078 | 2144 | 1825 | 785  | 2.99E-13 | 4.01E-05 |
| SPT10 | TCAAAT                                 | 6078 | 1442 | 4566 | 1190 | 1.96E-11 | 2.63E-03 |
| SPT2  | TATA-[4, 5, 7]-TATA                    | 6179 | 1177 | 1945 | 498  | 2.01E-15 | 2.70E-07 |
| SPT2  | ATAT-[3, 5, 6, 8, 9, 10]-ATAA          | 6179 | 1494 | 2983 | 866  | 6.79E-15 | 9.11E-07 |
| SPT23 | AAAT-[0, 3, 5, 6, 7, 8, 9]-ATTT        | 6176 | 2024 | 1529 | 640  | 9.12E-15 | 1.22E-06 |
| SPT23 | AATT-[2, 3, 5, 6, 7, 10]-AATT          | 6176 | 1192 | 2118 | 534  | 4.04E-14 | 5.42E-06 |
| SRD1  | TATT-[1, 5, 10]-AATA                   | 6107 | 754  | 1238 | 236  | 8.23E-12 | 1.10E-03 |
| SRD1  | TATA-[1, 3, 5, 7, 8]-AATA              | 6107 | 1298 | 1429 | 404  | 3.80E-10 | 5.10E-02 |
| STB1  | AGGCCTC                                | 6114 | 66   | 3665 | 62   | 1.89E-08 | 1.00E+00 |
| STB1  | CTTG-[2, 3, 5, 6, 8, 9]-ATCG           | 6114 | 171  | 408  | 36   | 5.37E-08 | 1.00E+00 |
| STB2  | CTCTAGTACT                             | 6052 | 7    | 99   | 5    | 1.52E-07 | 1.00E+00 |
| STB2  | GGTT-[1, 4, 5, 8, 9]-TCGA              | 6052 | 136  | 3214 | 106  | 1.61E-07 | 1.00E+00 |
| STB4  | TCGG-[1, 6, 7, 9]-CCGA                 | 6080 | 53   | 23   | 10   | 5.76E-14 | 7.73E-06 |
| STB4  | TATT-[0, 2, 4, 5, 8, 9]-AGAC           | 6080 | 344  | 2251 | 190  | 4.21E-10 | 5.65E-02 |
| STB5  | CCTA-[0, 6, 9]-TAGC                    | 5969 | 119  | 3772 | 106  | 1.40E-08 | 1.00E+00 |
| STB5  | AGTA-[0, 3, 8, 9, 10]-ACTA             | 5969 | 317  | 3313 | 230  | 3.26E-08 | 1.00E+00 |
| STB6  | AAAT-[2, 3, 4, 5, 8, 9, 10]-TCAA       | 5976 | 1286 | 4116 | 1006 | 4.71E-14 | 6.32E-06 |
| STB6  | TTGA-[1, 7, 8]-TCAA                    | 5976 | 361  | 3723 | 286  | 2.85E-10 | 3.83E-02 |
| STE12 | AACTTCTAGT                             | 6180 | 90   | 1784 | 75   | 3.54E-25 | 4.75E-17 |
| STE12 | GAACCTTCTAG                            | 6180 | 87   | 1784 | 73   | 7.09E-25 | 9.52E-17 |
| STP1  | TATT-[2, 3, 4, 5, 6, 9]-TGTA           | 6123 | 933  | 1709 | 363  | 1.48E-12 | 1.99E-04 |
| STP1  | ATTA-[1, 3, 4, 5, 7, 8, 9]-TTTA        | 6123 | 1278 | 3967 | 944  | 6.39E-12 | 8.58E-04 |

|      |                                        |      |      |      |      |          |          |
|------|----------------------------------------|------|------|------|------|----------|----------|
| STP2 | TATA-[1, 3, 8, 10]-AATT                | 5920 | 796  | 1823 | 344  | 9.10E-13 | 1.22E-04 |
| STP2 | ATAA-[0, 1, 7, 8, 9, 10]-AATT          | 5920 | 1253 | 1470 | 416  | 3.57E-11 | 4.79E-03 |
| STP4 | CGAA-[6]-CCTG                          | 6171 | 26   | 971  | 19   | 2.66E-09 | 3.57E-01 |
| STP4 | AACGAACAGA                             | 6171 | 20   | 207  | 10   | 4.01E-09 | 5.38E-01 |
| SUM1 | AATA-[0, 1, 2, 3, 4, 6, 7, 8, 10]-TATT | 6081 | 1928 | 2114 | 869  | 5.44E-27 | 7.30E-19 |
| SUM1 | AATA-[0, 1, 2, 3, 5]-TTAT              | 6081 | 1096 | 1719 | 455  | 1.08E-22 | 1.45E-14 |
| SUT1 | CGGCGT                                 | 6107 | 220  | 1340 | 98   | 5.02E-12 | 6.74E-04 |
| SUT1 | CGGAGT                                 | 6107 | 261  | 1802 | 134  | 9.01E-12 | 1.21E-03 |
| SUT2 | GGGGGGCAAG                             | 6071 | 2    | 2    | 2    | 1.09E-07 | 1.00E+00 |
| SUT2 | CGTACTGTGA                             | 6071 | 2    | 2    | 2    | 1.09E-07 | 1.00E+00 |
| SWI4 | CGCGAAA                                | 6109 | 180  | 134  | 34   | 4.28E-21 | 5.74E-13 |
| SWI4 | CGCG-[0, 9, 10]-AAAA                   | 6109 | 193  | 82   | 27   | 7.38E-19 | 9.91E-11 |
| SWI5 | CACA-[1, 7]-ACAC                       | 6148 | 133  | 330  | 36   | 1.47E-14 | 1.97E-06 |
| SWI5 | ACAC-[2]-ACAC                          | 6148 | 93   | 341  | 29   | 4.42E-13 | 5.93E-05 |
| SWI6 | ACGCGT                                 | 6158 | 326  | 1021 | 135  | 1.43E-25 | 1.92E-17 |
| SWI6 | CGCG-[1, 3, 5, 8, 9, 10]-CGCG          | 6158 | 89   | 770  | 54   | 2.76E-25 | 3.70E-17 |
| TBS1 | AATA-[5, 6]-TTAG                       | 6178 | 237  | 612  | 58   | 5.84E-09 | 7.84E-01 |
| TBS1 | CCAACGTTG                              | 6178 | 10   | 935  | 10   | 6.05E-08 | 1.00E+00 |
| TEC1 | TGTTGGAATA                             | 6170 | 86   | 856  | 51   | 4.92E-21 | 6.60E-13 |
| TEC1 | TGATAATGTA                             | 6170 | 92   | 856  | 53   | 4.97E-21 | 6.67E-13 |
| THI2 | TTGA-[0, 1, 3, 4, 5, 8, 9]-ATTG        | 6072 | 747  | 4057 | 576  | 2.76E-08 | 1.00E+00 |
| THI2 | TCAT-[0, 1, 2, 3, 7, 8, 9, 10]-AATT    | 6072 | 1030 | 4117 | 786  | 3.74E-08 | 1.00E+00 |
| TOS8 | CCTCGACTAA                             | 6003 | 22   | 650  | 20   | 1.55E-16 | 2.08E-08 |
| TOS8 | CTCGACTAA                              | 6003 | 22   | 650  | 20   | 1.55E-16 | 2.08E-08 |
| TYE7 | TCACGTG                                | 6178 | 179  | 263  | 60   | 4.01E-37 | 5.38E-29 |
| TYE7 | CACGTGA                                | 6178 | 183  | 270  | 60   | 9.16E-36 | 1.23E-27 |
| UGA3 | TATT-[0, 1, 2, 3, 5, 6, 9, 10]-AATA    | 4799 | 1231 | 2672 | 802  | 4.43E-12 | 5.95E-04 |
| UGA3 | TAAT-[0, 1, 5, 6, 9]-GTAA              | 4799 | 470  | 909  | 148  | 1.82E-09 | 2.44E-01 |
| UME6 | AGCCGCC                                | 5930 | 126  | 556  | 79   | 7.57E-49 | 1.02E-40 |
| UME6 | TAGC-[0]-CGCC                          | 5930 | 76   | 556  | 61   | 5.16E-48 | 6.93E-40 |
| UPC2 | TTTA-[1, 3, 5, 6, 7, 8, 9]-AAAT        | 5994 | 1569 | 3215 | 1018 | 1.30E-22 | 1.74E-14 |
| UPC2 | AATA-[0, 1, 2, 4, 7, 8, 9, 10]-TTTA    | 5994 | 1654 | 3727 | 1197 | 2.46E-21 | 3.30E-13 |
| USV1 | TGCCATAAA                              | 5555 | 28   | 1117 | 20   | 1.67E-07 | 1.00E+00 |
| USV1 | ACGA-[1]-TCGT                          | 5555 | 33   | 1975 | 28   | 2.31E-07 | 1.00E+00 |

|         |                                           |      |      |      |      |          |          |
|---------|-------------------------------------------|------|------|------|------|----------|----------|
| WAR1    | ATTT-[1, 3, 4, 5, 7, 9]-AAAA              | 5991 | 1776 | 3925 | 1307 | 5.88E-15 | 7.89E-07 |
| WAR1    | ATGA-[0, 2, 3, 4, 5, 7, 8, 9]-TTAT        | 5991 | 831  | 4580 | 719  | 4.98E-12 | 6.68E-04 |
| WTM1    | AAAT-[3, 6, 7, 9]-AATT                    | 6111 | 1095 | 751  | 229  | 1.36E-16 | 1.83E-08 |
| WTM1    | AAAT-[2, 3, 4, 5, 7, 8, 9]-TCAA           | 6111 | 1334 | 3643 | 936  | 1.92E-16 | 2.58E-08 |
| WTM2    | TGAG-[2, 6, 8]-CAGT                       | 6089 | 90   | 2367 | 66   | 2.24E-09 | 3.01E-01 |
| WTM2    | TTAA-[4, 5, 8, 10]-TTAA                   | 6089 | 622  | 1719 | 247  | 2.91E-08 | 1.00E+00 |
| XBP1    | CACG-[0, 2, 3, 5, 6, 7, 8, 10]-CGGC       | 6037 | 83   | 2866 | 75   | 7.44E-15 | 9.99E-07 |
| XBP1    | CCTCGACTAA                                | 6037 | 22   | 907  | 20   | 1.08E-13 | 1.45E-05 |
| YAP1    | TTAA-[0, 1, 2, 3, 4, 6, 7, 9]-AATA        | 6178 | 1511 | 2876 | 846  | 2.69E-14 | 3.61E-06 |
| YAP1    | ATTA-[1, 2, 3, 6, 8, 10]-TAAT             | 6178 | 960  | 1045 | 252  | 8.08E-13 | 1.08E-04 |
| YAP3    | GACT-[8, 9, 10]-TAGT                      | 5938 | 85   | 2370 | 62   | 4.44E-08 | 1.00E+00 |
| YAP3    | TATG-[6]-GTAT                             | 5938 | 57   | 3778 | 55   | 1.79E-07 | 1.00E+00 |
| YAP5    | GCGG-[7]-ACGA                             | 5844 | 32   | 53   | 21   | 5.20E-36 | 6.98E-28 |
| YAP5    | TCCA-[9, 10]-ATCC                         | 5844 | 77   | 45   | 24   | 3.42E-33 | 4.59E-25 |
| YAP6    | TTTC-[0, 6, 9, 10]-TTTT                   | 6130 | 2182 | 1243 | 562  | 6.37E-12 | 8.55E-04 |
| YAP6    | CCTA-[10]-CTTC                            | 6130 | 43   | 11   | 7    | 6.96E-12 | 9.34E-04 |
| YAP7    | ATTG-[0, 2, 3, 4, 5, 6, 7, 8]-AATG        | 5971 | 696  | 4085 | 558  | 8.81E-11 | 1.18E-02 |
| YAP7    | AATA-[0, 1, 5, 6, 8, 10]-TTAA             | 5971 | 1124 | 827  | 234  | 5.12E-10 | 6.87E-02 |
| YBL054W | AAAT-[0, 3, 5, 6, 7, 8, 9]-TGTA           | 6164 | 966  | 3855 | 704  | 1.12E-10 | 1.50E-02 |
| YBL054W | TGAT-[0, 1, 2, 3, 6, 7, 8]-TTTG           | 6164 | 754  | 2100 | 340  | 1.03E-08 | 1.00E+00 |
| YBR239c | TTTA-[0, 1, 3, 4, 5, 6, 7, 8, 9]-AAAT     | 6143 | 1884 | 3640 | 1283 | 3.62E-18 | 4.86E-10 |
| YBR239c | TTTA-[0, 1, 2, 4, 5, 7, 8, 9, 10]-AATT    | 6143 | 1671 | 3760 | 1177 | 4.65E-17 | 6.24E-09 |
| YBR267W | AAGA-[2, 3, 4, 6]-TGAT                    | 5757 | 412  | 1801 | 200  | 9.85E-12 | 1.32E-03 |
| YBR267W | ATGAAG                                    | 5757 | 943  | 4223 | 780  | 1.09E-10 | 1.46E-02 |
| YDR026c | CCGGGTAAA                                 | 6064 | 35   | 88   | 18   | 1.70E-23 | 2.28E-15 |
| YDR026c | CCGG-[0, 8, 10]-GTAA                      | 6064 | 136  | 236  | 37   | 5.79E-20 | 7.77E-12 |
| YDR049W | ATTT-[1, 4, 7, 8, 9, 10]-AAAT             | 6042 | 1566 | 2177 | 705  | 1.48E-14 | 1.99E-06 |
| YDR049W | TTTA-[0, 1, 2, 3, 4, 6, 7, 8, 9, 10]-AATT | 6042 | 1836 | 2255 | 825  | 1.07E-12 | 1.44E-04 |
| YDR266c | TTGA-[1, 2, 5, 6, 7, 8, 9]-TCAA           | 6092 | 808  | 3422 | 556  | 1.74E-12 | 2.34E-04 |
| YDR266c | ATTT-[1, 2, 4, 7, 8, 9, 10]-AAAT          | 6092 | 1768 | 1577 | 568  | 2.46E-09 | 3.30E-01 |
| YDR520C | CTCCGGCGG                                 | 6073 | 4    | 26   | 4    | 1.06E-09 | 1.42E-01 |
| YDR520C | TCTCCGGCGG                                | 6073 | 3    | 14   | 3    | 2.93E-08 | 1.00E+00 |
| YER051w | ATTT-[1, 4, 7, 8, 9, 10]-AAAT             | 6135 | 1596 | 1390 | 494  | 2.45E-16 | 3.29E-08 |
| YER051w | TTAA-[0, 1, 3, 4, 5, 8, 10]-TCAT          | 6135 | 752  | 2018 | 345  | 1.26E-12 | 1.69E-04 |

|         |                                        |      |      |      |      |          |          |
|---------|----------------------------------------|------|------|------|------|----------|----------|
| YER130C | ATTT-[1, 4, 7, 8, 9, 10]-AAAT          | 6059 | 1576 | 1881 | 629  | 2.73E-15 | 3.66E-07 |
| YER130C | AATT-[2, 3, 4, 7, 8, 9, 10]-TAAA       | 6059 | 1499 | 2632 | 786  | 6.52E-13 | 8.75E-05 |
| YER184C | TTCA-[1, 2, 6]-TGAA                    | 5740 | 345  | 43   | 19   | 2.84E-10 | 3.81E-02 |
| YER184C | ATTC-[2, 4, 9, 10]-CGAG                | 5740 | 136  | 240  | 24   | 1.65E-07 | 1.00E+00 |
| YFL044C | ATTT-[3, 4, 6, 7, 9, 10]-TTAT          | 6156 | 1669 | 3511 | 1092 | 3.24E-13 | 4.35E-05 |
| YFL044C | TTCAAT                                 | 6156 | 1698 | 3128 | 1002 | 1.86E-12 | 2.50E-04 |
| YFL052w | TTGA-[1, 3, 4, 5, 6, 7, 8, 9, 10]-TCAA | 5966 | 980  | 3413 | 683  | 1.20E-15 | 1.61E-07 |
| YFL052w | AAAT-[1, 2, 3, 4, 5, 7, 8]-TCAA        | 5966 | 1327 | 3081 | 819  | 5.21E-14 | 6.99E-06 |
| YGR067C | ATTT-[0, 1, 2, 3, 5, 6, 7, 8, 10]-TAAT | 5913 | 1569 | 3969 | 1180 | 6.52E-13 | 8.75E-05 |
| YGR067C | ATTT-[0, 1, 2, 4, 6, 8, 9, 10]-AAAT    | 5913 | 1770 | 4994 | 1594 | 1.10E-12 | 1.48E-04 |
| YHP1    | TGAA-[1, 2, 3, 4, 5, 6, 7, 9, 10]-AATT | 5963 | 1505 | 3621 | 1038 | 1.87E-11 | 2.51E-03 |
| YHP1    | AAAT-[0, 2, 3, 5, 6, 7, 8, 10]-TCAA    | 5963 | 1421 | 3540 | 956  | 2.00E-09 | 2.68E-01 |
| YJL206C | TGCAACGCTA                             | 6055 | 3    | 5    | 3    | 8.11E-10 | 1.09E-01 |
| YJL206C | GTATTGCAAC                             | 6055 | 3    | 5    | 3    | 8.11E-10 | 1.09E-01 |
| YKL222C | CTAA-[0, 1, 4, 7, 8, 9, 10]-ATTT       | 6071 | 838  | 4486 | 711  | 2.14E-13 | 2.87E-05 |
| YKL222C | TAAA-[5, 6, 7, 9]-ATTT                 | 6071 | 1011 | 4168 | 796  | 4.74E-12 | 6.36E-04 |
| YKR064W | ATTT-[1, 2, 4, 5, 6, 7, 8, 9, 10]-AAAT | 6145 | 2160 | 3821 | 1509 | 4.39E-17 | 5.89E-09 |
| YKR064W | AATT-[1, 2, 3, 5, 6, 7, 8, 9, 10]-TGAA | 6145 | 1418 | 3336 | 905  | 1.24E-13 | 1.66E-05 |
| YLR278C | ATTT-[0, 2, 3, 5, 6, 7]-TCAA           | 5985 | 1147 | 4330 | 938  | 1.81E-13 | 2.43E-05 |
| YLR278C | TTTA-[1, 2, 3, 4, 5, 7, 8, 10]-AATT    | 5985 | 1554 | 4173 | 1209 | 2.24E-13 | 3.01E-05 |
| YML081W | ATCGTCTAT                              | 6174 | 49   | 1405 | 38   | 2.43E-14 | 3.26E-06 |
| YML081W | ATTATCATAT                             | 6174 | 90   | 1282 | 54   | 3.18E-14 | 4.27E-06 |
| YNR063W | AAAT-[2, 3, 4, 6, 7, 8, 9, 10]-ATTT    | 6022 | 2059 | 3761 | 1431 | 3.12E-13 | 4.19E-05 |
| YNR063W | AATT-[2, 3, 4, 7, 8, 9, 10]-AATT       | 6022 | 1350 | 2804 | 757  | 1.63E-12 | 2.19E-04 |
| YOX1    | AAAT-[0, 1, 2, 3, 4, 6, 9, 10]-TTTT    | 6179 | 2299 | 4977 | 2016 | 6.09E-26 | 8.17E-18 |
| YOX1    | AAAT-[0, 1, 2, 3, 4, 5, 6, 7, 9]-ATTT  | 6179 | 2318 | 3270 | 1427 | 5.79E-23 | 7.77E-15 |
| YPR022C | ATTT-[0, 6, 7, 9, 10]-AAAT             | 5977 | 1236 | 2661 | 673  | 2.94E-12 | 3.95E-04 |
| YPR022C | TATT-[0, 2, 3, 5, 6, 8, 10]-AATA       | 5977 | 1423 | 2925 | 819  | 7.90E-11 | 1.06E-02 |
| YPR196W | GGTC-[7, 8]-AGCG                       | 6132 | 38   | 197  | 14   | 1.47E-10 | 1.97E-02 |
| YPR196W | AAGTATCCAA                             | 6132 | 17   | 197  | 10   | 2.54E-10 | 3.41E-02 |
| YRR1    | CAAC-[3, 7, 10]-TGAG                   | 6030 | 100  | 2544 | 74   | 7.86E-09 | 1.00E+00 |
| YRR1    | TCCA-[2, 8, 10]-TCCA                   | 6030 | 173  | 1906 | 95   | 1.87E-08 | 1.00E+00 |
| ZAP1    | CAGA-[2, 6]-CCTG                       | 6084 | 48   | 106  | 14   | 1.40E-12 | 1.88E-04 |
| ZAP1    | AATATT                                 | 6084 | 2332 | 1390 | 654  | 6.18E-11 | 8.29E-03 |

|      |                        |      |    |      |    |          |          |
|------|------------------------|------|----|------|----|----------|----------|
| ZMS1 | GCGG-[2, 3, 6, 8]-GCAG | 5996 | 59 | 2976 | 53 | 3.03E-09 | 4.07E-01 |
| ZMS1 | CTTCGACCC              | 5996 | 4  | 9    | 3  | 3.74E-08 | 1.00E+00 |



**Table S2**

Comparison between the predictions of DRIMUST and those of other applications on the Harbison dataset

| <b>TFs for which Harbison and DRIMUST predict similar motifs</b> | <b>TFs for which DRIMUST and Harbison predict different motifs</b> | <b>TFs for which DRIMUST identifies motifs that Harbison does not</b> |
|------------------------------------------------------------------|--------------------------------------------------------------------|-----------------------------------------------------------------------|
| <b>22</b>                                                        | <b>80</b>                                                          | <b>101</b>                                                            |
| ABF1                                                             | ACE2                                                               | A1 (MATA1)                                                            |
| CBF1                                                             | ADR1                                                               | ABT1                                                                  |
| CIN5                                                             | AFT2                                                               | ACA1                                                                  |
| FKH2                                                             | ARR1                                                               | ARG80                                                                 |
| GAL4                                                             | ASH1                                                               | ARG81                                                                 |
| GCN4                                                             | AZF1                                                               | ARO80                                                                 |
| INO4                                                             | BAS1                                                               | ASK10                                                                 |
| MBP1                                                             | CAD1                                                               | BYE1                                                                  |
| MET4                                                             | DAL80                                                              | CHA4                                                                  |
| PUT3                                                             | DAL81                                                              | CRZ1                                                                  |
| RAP1                                                             | DAL82                                                              | CST6                                                                  |
| REB1                                                             | DIG1                                                               | CUP9                                                                  |
| RLM1                                                             | FHL1                                                               | DAT1                                                                  |
| SFP1                                                             | FKH1                                                               | DOT6                                                                  |
| SKN7                                                             | GAL80                                                              | ECM22                                                                 |
| STB4                                                             | GAT1                                                               | EDS1                                                                  |
| SUT1                                                             | GCR1                                                               | FAP7                                                                  |
| SWI4                                                             | GLN3                                                               | FZF1                                                                  |
| TYE7                                                             | GZF3                                                               | GAL3                                                                  |
| UME6                                                             | HAC1                                                               | GAT3                                                                  |
| YAP1                                                             | HAP1                                                               | GCR2                                                                  |
| YOX1                                                             | HAP2                                                               | GTS1                                                                  |
|                                                                  | HAP3                                                               | HAA1                                                                  |
|                                                                  | HAP4                                                               | HAL9                                                                  |
|                                                                  | HAP5                                                               | HIR1                                                                  |
|                                                                  | HSF1                                                               | HIR2                                                                  |
|                                                                  | IME1                                                               | HIR3                                                                  |
|                                                                  | INO2                                                               | HMS1                                                                  |

|        |       |
|--------|-------|
| LEU3   | HMS2  |
| MAC1   | HOG1  |
| MCM1   | IFH1  |
| MET31  | IME4  |
| MET32  | IXR1  |
| MOT3   | KRE33 |
| MSN2   | KSS1  |
| MSN4   | MAL13 |
| NDD1   | MAL33 |
| NRG1   | MBF1  |
| OPI1   | MDS3  |
| PDR1   | MET18 |
| PDR3   | MET28 |
| PHD1   | MGA1  |
| PHO2   | MIG1  |
| PHO4   | MIG2  |
| RCS1   | MIG3  |
| RDS1   | MSN1  |
| RFX1   | MSS11 |
| RGT1   | MTH1  |
| RIM101 | NDT80 |
| RLR1   | NNF2  |
| ROX1   | OAF1  |
| RPH1   | PDC2  |
| RPN4   | PIP2  |
| RTG3   | PPR1  |
| SIG1   | RCO1  |
| SIP4   | RDR1  |
| SKO1   | RGM1  |
| SMP1   | RME1  |
| SNT2   | RPI1  |
| SOK2   | RTG1  |
| SPT2   | RTS2  |
| SPT23  | SFL1  |
| STB1   | SIP3  |

STB5  
STE12  
STP1  
SUM1  
SWI5  
SWI6  
TEC1  
THI2  
UGA3  
XBP1  
YAP3  
YAP5  
YAP6  
YAP7  
YDR026c  
YHP1  
ZAP1

SMK1  
SNF1  
SPT10  
SRD1  
STB2  
STB6  
STP2  
STP4  
SUT2  
TBS1  
TOS8  
UPC2  
USV1  
WAR1  
WTM1  
WTM2  
YBL054W  
YBR239c  
YBR267W  
YDR049W  
YDR266c  
YDR520C  
YER051w  
YER130C  
YER184C  
YFL044C  
YFL052w  
YGR067C  
YJL206C  
YKL222C  
YKR064W  
YLR278C  
YML081W  
YNR063W  
YPR022C

YPR196W

YRR1

ZMS1

\* We marked in red the TFs at the second and third columns for which our predictions are similar to those reported in:  
Eden E, Lipson D, Yogev S, Yakhini Z (2007) Discovering Motifs in Ranked Lists of DNA Sequences. PLoS Comput Biol 3: e39.

Details for Table S2:

| TF         | first half | second half | gap lengths                        | p-value ≤ | Harbison's motif  | Annotated motif as define by Harbison et al. | Agreement indication (with any of the previous two columns) | Agreement with Eden et al. (in case DRIMUST and others don't agree) (DRIMUST closest prediction is indicated in parenthesis) |
|------------|------------|-------------|------------------------------------|-----------|-------------------|----------------------------------------------|-------------------------------------------------------------|------------------------------------------------------------------------------------------------------------------------------|
| A1 (MATA1) | ATAA       | TATT        | [0, 2, 3, 6, 7, 9]                 | 5.64E-12  |                   |                                              | Only DRIMUST                                                |                                                                                                                              |
| A1 (MATA1) | AATGAA     |             |                                    | 2.21E-11  |                   |                                              | Only DRIMUST                                                |                                                                                                                              |
| ABF1       | TCGT       | TGAT        | [6]                                | 3.53E-63  | rTCAYtntnnnAcg    | rTCAYTnnnnACGw                               | Agree                                                       |                                                                                                                              |
| ABF1       | ATCA       | ACGA        | [6]                                | 7.23E-63  | rTCAYtntnnnAcg    | rTCAYTnnnnACGw                               | Agree                                                       |                                                                                                                              |
| ABT1       | ATTT       | AAAT        | [0, 1, 2, 4, 6, 7, 8, 9, 10]       | 4.49E-21  |                   |                                              | Only DRIMUST                                                |                                                                                                                              |
| ABT1       | AATA       | TTTA        | [0, 1, 2, 3, 4, 5, 6, 7, 8, 9, 10] | 1.42E-20  |                   |                                              | Only DRIMUST                                                |                                                                                                                              |
| ACA1       | AACA       | TTTC        | [1, 4, 6]                          | 4.34E-09  |                   |                                              | Only DRIMUST                                                |                                                                                                                              |
| ACA1       | TGCT       | AGCA        | [2, 4, 5, 6, 8, 10]                | 8.30E-09  |                   |                                              | Only DRIMUST                                                |                                                                                                                              |
| ACE2       | CACA       | CACA        | [4, 6, 7, 9, 10]                   | 4.68E-10  | tGCTGGT           | GCTGGT                                       | Disagree                                                    |                                                                                                                              |
| ACE2       | ACAC       | ACAC        | [0, 6, 7, 8, 9]                    | 1.13E-09  | tGCTGGT           | GCTGGT                                       | Disagree                                                    | CACACA (ACACACAC)                                                                                                            |
| ADR1       | ACTT       | TGAC        | [2, 3, 6, 9, 10]                   | 2.41E-08  |                   | GGrGk                                        | Disagree                                                    |                                                                                                                              |
| ADR1       | AGAT       | CAAC        | [0, 1, 3, 4, 5, 10]                | 4.38E-08  |                   | GGrGk                                        | Disagree                                                    |                                                                                                                              |
| AFT2       | TATCCACGA  |             |                                    | 6.11E-17  | rCACCC            | AAAGTGACCCATT                                | Disagree                                                    |                                                                                                                              |
| AFT2       | AGATACTGTG |             |                                    | 1.10E-15  | rCACCC            | AAAGTGACCCATT                                | Disagree                                                    |                                                                                                                              |
| ARG80      | ATTT       | AAAT        | [1, 2, 4, 7, 8, 9, 10]             | 1.35E-23  |                   |                                              | Only DRIMUST                                                |                                                                                                                              |
| ARG80      | AAAT       | AATT        | [0, 1, 3, 5, 6, 7, 8, 9, 10]       | 3.81E-23  |                   |                                              | Only DRIMUST                                                |                                                                                                                              |
| ARG81      | AATT       | ATAT        | [2, 5, 6, 7, 10]                   | 2.63E-17  |                   |                                              | Only DRIMUST                                                |                                                                                                                              |
| ARG81      | TATT       | TAAT        | [0, 1, 2, 3, 4, 5, 6, 7, 8, 9]     | 1.49E-16  |                   |                                              | Only DRIMUST                                                | AWTWGA (TATTTAAT)                                                                                                            |
| ARO80      | ATTT       | AAATA       | [0, 2, 3, 4, 6, 8, 9, 10]          | 6.21E-12  |                   |                                              | Only DRIMUST                                                |                                                                                                                              |
| ARO80      | TAAT       | TTTA        | [2, 3, 4, 6, 7, 8, 9]              | 4.87E-11  |                   |                                              | Only DRIMUST                                                |                                                                                                                              |
| ARR1       | ATTT       | TTAT        | [0, 3, 4, 5, 6, 8, 9, 10]          | 3.40E-22  |                   | TTACTAA                                      | Disagree                                                    |                                                                                                                              |
| ARR1       | ATAT       | TAAT        | [1, 3, 5, 6, 7, 8, 9, 10]          | 2.31E-20  |                   | TTACTAA                                      | Disagree                                                    |                                                                                                                              |
| ASH1       | GGTC       | GCGG        | [9]                                | 1.45E-15  |                   | yTGACT                                       | Disagree                                                    |                                                                                                                              |
| ASH1       | CTCCTCGAC  |             |                                    | 1.45E-15  |                   | yTGACT                                       | Disagree                                                    | CCWCGW (CTCCTCGAC)                                                                                                           |
| ASK10      | AAAT       | TCAA        | [1, 2, 3, 4, 5, 6, 8, 9]           | 5.48E-15  |                   |                                              | Only DRIMUST                                                |                                                                                                                              |
| ASK10      | TGAT       | TCAA        | [0, 3, 4, 5, 6, 7, 8, 9]           | 7.34E-15  |                   |                                              | Only DRIMUST                                                |                                                                                                                              |
| AZF1       | AAATCACTTC |             |                                    | 3.12E-09  | YwTTkckkTyycgykky | TTTTTCTT                                     | Disagree                                                    |                                                                                                                              |
| AZF1       | ACAGCTGTA  |             |                                    | 6.36E-08  | YwTTkckkTyycgykky | TTTTTCTT                                     | Disagree                                                    |                                                                                                                              |
| BAS1       | TAAT       | TTTA        | [2, 3, 4, 5, 6, 7, 8, 9]           | 4.87E-11  | TGACTC            | TGACTC                                       | Disagree                                                    |                                                                                                                              |
| BAS1       | ATTT       | TATT        | [1, 5, 7, 9, 10]                   | 1.93E-09  | TGACTC            | TGACTC                                       | Disagree                                                    |                                                                                                                              |
| BYE1       | AATT       | AATT        | [2, 3, 5, 6, 7, 10]                | 6.80E-16  |                   |                                              | Only DRIMUST                                                |                                                                                                                              |
| BYE1       | TATT       | ATGT        | [2, 3, 5, 6, 10]                   | 4.98E-12  |                   |                                              | Only DRIMUST                                                |                                                                                                                              |
| CAD1       | ATCC       | CCAC        | [0, 10]                            | 1.35E-15  | mTTAsTmAkC        | TTACTAA                                      | Disagree                                                    |                                                                                                                              |
| CAD1       | CCAC       | GCGG        | [3, 6]                             | 1.04E-14  | mTTAsTmAkC        | TTACTAA                                      | Disagree                                                    |                                                                                                                              |
| CBF1       | CACGTG     |             |                                    | 9.79E-77  | tCACGTG           | rTCACrTGA                                    | Agree                                                       |                                                                                                                              |
| CBF1       | CACGTGA    |             |                                    | 1.37E-62  | tCACGTG           | rTCACrTGA                                    | Agree                                                       |                                                                                                                              |
| CHA4       | ATTT       | AAAA        | [1, 2, 3, 6, 7, 8, 10]             | 3.35E-16  |                   |                                              | Only DRIMUST                                                |                                                                                                                              |
| CHA4       | ATTT       | AAAT        | [1, 2, 3, 7, 8, 9, 10]             | 8.35E-14  |                   |                                              | Only DRIMUST                                                |                                                                                                                              |
| CIN5       | TTAC       | TAAT        | [1]                                | 3.77E-20  | TTAcrTAA          | TTACTAA                                      | Agree                                                       |                                                                                                                              |
| CIN5       | ATTA       | GTAA        | [1]                                | 1.84E-19  | TTAcrTAA          | TTACTAA                                      | Agree                                                       |                                                                                                                              |
| CRZ1       | CCTCGACTAA |             |                                    | 3.71E-16  |                   |                                              | Only DRIMUST                                                |                                                                                                                              |
| CRZ1       | CTCGACTAA  |             |                                    | 3.71E-16  |                   |                                              | Only DRIMUST                                                |                                                                                                                              |
| CST6       | TGAA       | TTAA        | [1, 3, 4, 6, 7, 8, 9, 10]          | 1.18E-11  |                   |                                              | Only DRIMUST                                                |                                                                                                                              |
| CST6       | TAAA       | TTAA        | [3, 5, 6, 9, 10]                   | 7.91E-11  |                   |                                              | Only DRIMUST                                                |                                                                                                                              |
| CUP9       | GAGG       | CGTA        | [1, 2, 6, 9]                       | 1.06E-09  |                   |                                              | Only DRIMUST                                                |                                                                                                                              |
| CUP9       | CATC       | TACT        | [0, 9]                             | 5.14E-09  |                   |                                              | Only DRIMUST                                                |                                                                                                                              |
| DAL80      | TTCA       | AATG        | [0, 1, 6, 8]                       | 3.70E-11  |                   | GATAA                                        | Disagree                                                    |                                                                                                                              |
| DAL80      | ATTAAA     |             |                                    | 5.88E-10  |                   | GATAA                                        | Disagree                                                    |                                                                                                                              |
| DAL81      | TCCT       | AGGA        | [2, 5, 7]                          | 3.54E-15  |                   | AAAAGCCGCGGGCGGGATT                          | Disagree                                                    |                                                                                                                              |
| DAL81      | GGAT       | CCTA        | [1, 2]                             | 1.41E-11  |                   | AAAAGCCGCGGGCGGGATT                          | Disagree                                                    |                                                                                                                              |
| DAL82      | GATA       | CTCA        | [3, 4, 5, 6, 7, 9]                 | 4.40E-08  | GATAAG            |                                              | Disagree                                                    |                                                                                                                              |
| DAL82      | CAGG       | TATA        | [1, 3, 7]                          | 1.22E-07  | GATAAG            |                                              | Disagree                                                    |                                                                                                                              |
| DAT1       | CTGAGCAACG |             |                                    | 1.12E-15  |                   |                                              | Only DRIMUST                                                |                                                                                                                              |
| DAT1       | CGGCTGAGCA |             |                                    | 1.12E-15  |                   |                                              | Only DRIMUST                                                |                                                                                                                              |
| DIG1       | CTGTATACCT |             |                                    | 1.08E-21  | TgAAAcA           |                                              | Disagree                                                    |                                                                                                                              |
| DIG1       | CTGT       | CCTA        | [3]                                | 1.91E-21  | TgAAAcA           |                                              | Disagree                                                    |                                                                                                                              |
| DOT6       | CGGC       | GCCG        | [0, 2, 3, 7, 8, 10]                | 7.09E-11  |                   |                                              | Only DRIMUST                                                | CGSGSC (CGGCGCCG)                                                                                                            |
| DOT6       | ACGA       | CGTG        | [7, 9]                             | 1.91E-09  |                   |                                              | Only DRIMUST                                                |                                                                                                                              |

|       |            |      |                                 |          |                  |              |                             |
|-------|------------|------|---------------------------------|----------|------------------|--------------|-----------------------------|
| ECM22 | CACA       | CGCA | [4, 5, 6]                       | 1.93E-12 |                  | Only DRIMUST |                             |
| ECM22 | GCAG       | CGGC | [0, 1, 2, 3, 4, 5, 8, 10]       | 1.21E-10 |                  | Only DRIMUST |                             |
| EDS1  | ATTA       | TTCA | [5, 9, 10]                      | 1.74E-09 |                  | Only DRIMUST |                             |
| EDS1  | AAGA       | CTAT | [0, 1, 3, 4, 6, 8, 9]           | 9.45E-09 |                  | Only DRIMUST |                             |
| FAP7  | TAAG       | TTTT | [0, 1, 3, 5, 9]                 | 8.13E-08 |                  | Only DRIMUST |                             |
| FAP7  | TAAA       | TTTA | [3, 4, 5, 6, 9, 10]             | 1.20E-07 |                  | Only DRIMUST |                             |
| FHL1  | ATCC       | ACAT | [2]                             | 2.16E-39 | TGTayGGrtg       | Disagree     |                             |
| FHL1  | ATCC       | TACA | [1]                             | 2.73E-39 | TGTayGGrtg       | Disagree     | WNMAYCCRTACAYHH (ATCCNTACA) |
| FKH1  | TGTTTAC    |      |                                 | 9.19E-21 | gtAAAcAA         | Disagree     |                             |
| FKH1  | TTGT       | TTAC | [0]                             | 4.59E-19 | gtAAAcAA         | Disagree     |                             |
| FKH2  | GTAACAA    |      |                                 | 4.62E-15 | GTAACAA          | Agree        |                             |
| FKH2  | TTGTTTAC   |      |                                 | 1.52E-14 | GTAACAA          | Agree        |                             |
| FZF1  | AAAT       | ATTT | [0, 1, 5, 6, 7, 9, 10]          | 2.94E-12 |                  | Only DRIMUST |                             |
| FZF1  | TATT       | AAAT | [0, 1, 2, 3, 4, 6, 9]           | 1.30E-09 |                  | Only DRIMUST |                             |
| GAL3  | TAAT       | ACTT | [0, 3, 7, 8, 10]                | 4.92E-11 |                  | Only DRIMUST |                             |
| GAL3  | TGAA       | TCAA | [1, 2, 4, 5, 6, 7]              | 9.56E-11 |                  | Only DRIMUST |                             |
| GAL4  | CGGA       | CCGT | [10]                            | 2.33E-09 | CGGnnnnnnnnnnnCg | Agree        |                             |
| GAL4  | ATCA       | GTTA | [1, 10]                         | 2.75E-09 | CGGnnnnnnnnnnnCg | Agree        |                             |
| GAL80 | AAAT       | TCAA | [0, 1, 2, 3, 4, 5, 6, 7, 9, 10] | 4.63E-12 |                  | Disagree     |                             |
| GAL80 | TTGA       | ATCA | [0, 2, 5, 6, 8, 9]              | 1.39E-09 |                  | Disagree     |                             |
| GAT1  | CCAC       | CCAG | [0, 1, 3, 4, 5, 6, 7, 8, 9, 10] | 6.31E-17 | aGATAAG          | Disagree     | CCRCYC (CCACCCAG)           |
| GAT1  | CGGCGC     |      |                                 | 3.07E-14 | aGATAAG          | Disagree     |                             |
| GAT3  | GCGG       | ACGA | [7, 10]                         | 2.49E-34 |                  | Only DRIMUST |                             |
| GAT3  | CACG       | GAGC | [5, 8]                          | 3.78E-31 |                  | Only DRIMUST |                             |
| GCN4  | TGACTCA    |      |                                 | 1.15E-30 | TGAsTCa          | Agree        |                             |
| GCN4  | ATGACTCA   |      |                                 | 2.52E-20 | TGAsTCa          | Agree        |                             |
| GCR1  | CCATTTTGAG |      |                                 | 4.86E-16 |                  | Disagree     |                             |
| GCR1  | ATTCCATTTT |      |                                 | 1.52E-15 |                  | Disagree     |                             |
| GCR2  | AAAT       | TCAT | [0, 1, 4, 6, 9, 10]             | 1.27E-12 |                  | Only DRIMUST |                             |
| GCR2  | TAAA       | TTTA | [1, 2, 4, 8, 9, 10]             | 3.18E-11 |                  | Only DRIMUST |                             |
| GLN3  | AAAT       | ATTT | [1, 2, 3, 4, 5, 6, 9]           | 4.97E-17 | GATAAGa          | Disagree     |                             |
| GLN3  | TAAA       | TATT | [0, 1, 2, 3, 4, 5, 7, 8, 10]    | 6.84E-16 | GATAAGa          | Disagree     | DHDATAWAGGDH (TAAATATT)     |
| GTS1  | ATAA       | AAGT | [0, 2, 5, 7, 10]                | 5.78E-08 |                  | Only DRIMUST |                             |
| GTS1  | CATA       | GCCA | [2, 3]                          | 1.59E-07 |                  | Only DRIMUST |                             |
| GZF3  | ATGA       | AACA | [1, 2, 3, 4, 6, 8]              | 1.34E-08 |                  | Disagree     |                             |
| GZF3  | CTGA       | TGAT | [0, 1, 3, 4, 7, 9, 10]          | 1.78E-08 |                  | Disagree     |                             |
| HAA1  | CAAA       | TTGA | [0, 3, 5, 6, 7, 8, 9]           | 3.02E-10 |                  | Only DRIMUST |                             |
| HAA1  | ATGAAG     |      |                                 | 3.30E-10 |                  | Only DRIMUST |                             |
| HAC1  | AAAT       | TAAA | [0, 3, 4, 5, 7, 8, 9, 10]       | 5.51E-12 |                  | Disagree     |                             |
| HAC1  | AAAA       | AAAT | [1, 2, 4, 5, 7, 8, 9, 10]       | 1.34E-11 |                  | Disagree     |                             |
| HAL9  | TGTT       | GAAT | [1]                             | 1.64E-16 |                  | Only DRIMUST |                             |
| HAL9  | AATT       | AATT | [2, 3, 6, 7, 9, 10]             | 4.49E-16 |                  | Only DRIMUST |                             |
| HAP1  | TTTATCGG   |      |                                 | 4.96E-19 | GGnnaTAnCGs      | Disagree     |                             |
| HAP1  | TTTA       | TCGG | [0]                             | 4.96E-19 | GGnnaTAnCGs      | Disagree     |                             |
| HAP2  | AATATT     |      |                                 | 4.82E-08 |                  | Disagree     |                             |
| HAP2  | GTTA       | AGAT | [2, 4, 8]                       | 1.88E-07 |                  | Disagree     |                             |
| HAP3  | AAAT       | TTTA | [0, 2, 4, 6, 7, 9, 10]          | 2.01E-16 |                  | Disagree     | AAWCTW (AAATTTTA)           |
| HAP3  | ATTT       | AATA | [0, 2, 4, 5, 8, 9]              | 3.57E-14 |                  | Disagree     |                             |
| HAP4  | CACG       | GAGC | [6, 8]                          | 1.89E-16 | gnCcAAtcA        | Disagree     |                             |
| HAP4  | GACTAAGCA  |      |                                 | 5.80E-16 | gnCcAAtcA        | Disagree     |                             |
| HAP5  | TATT       | AATA | [1, 2, 4, 5, 7, 8, 9, 10]       | 2.27E-13 |                  | Disagree     |                             |
| HAP5  | ATAT       | TTTA | [0, 1, 2, 3, 6, 8, 10]          | 2.27E-11 |                  | Disagree     |                             |
| HIR1  | ATTT       | ATTT | [1, 2, 5, 6, 8, 9]              | 4.57E-15 |                  | Only DRIMUST | ATWTR (ATTTNATTT)           |
| HIR1  | AATTTT     |      |                                 | 8.51E-11 |                  | Only DRIMUST |                             |
| HIR2  | ATAT       | ATAT | [0, 1, 3, 4, 5, 10]             | 1.79E-25 |                  | Only DRIMUST |                             |
| HIR2  | TATA       | TATA | [0, 1, 2, 5, 9]                 | 3.24E-24 |                  | Only DRIMUST |                             |
| HIR3  | TTTT       | AAAA | [0, 1, 2, 3, 4, 5, 6, 7, 8, 10] | 3.11E-25 |                  | Only DRIMUST |                             |
| HIR3  | AAAT       | ATTT | [0, 4, 5, 6, 7, 8, 9, 10]       | 4.12E-25 |                  | Only DRIMUST | ATTTWR (TTTTAAAA)           |
| HMS1  | ATTT       | TTTT | [0, 5, 7, 10]                   | 2.91E-13 |                  | Only DRIMUST |                             |
| HMS1  | AAAT       | ATTT | [0, 2, 5, 7, 9]                 | 8.24E-13 |                  | Only DRIMUST |                             |
| HMS2  | TGTA       | TTTT | [2, 6]                          | 4.47E-08 |                  | Only DRIMUST |                             |
| HMS2  | TTAA       | TTAC | [0, 1, 8]                       | 6.29E-07 |                  | Only DRIMUST | AAWYTC (TTAATTAC)           |

|       |            |      |                              |          |                 |              |                                               |
|-------|------------|------|------------------------------|----------|-----------------|--------------|-----------------------------------------------|
| HOG1  | TTTA       | AAAT | [0, 1, 3, 4, 5, 6, 7, 8, 9]  | 5.95E-24 |                 | Only DRIMUST | NDDNDWAWTAADNND (TTTAAAT)                     |
| HOG1  | ATTT       | AATT | [0, 2, 4, 5, 6, 7, 9, 10]    | 8.54E-23 |                 | Only DRIMUST |                                               |
| HSF1  | AATG       | CATT | [0, 1, 2, 5]                 | 1.58E-07 | TTCynnnnnnTTC   | Disagree     |                                               |
| HSF1  | TAAA       | ATCA | [0, 5]                       | 2.40E-07 | TTCynnnnnnTTC   | Disagree     |                                               |
| IFH1  | TCAC       | AATT | [6, 8, 9]                    | 8.81E-10 |                 | Only DRIMUST |                                               |
| IFH1  | ATTT       | GAAC | [0, 1, 2, 3, 8]              | 4.27E-08 |                 | Only DRIMUST |                                               |
| IME1  | ATCC       | TCGT | [3, 6, 10]                   | 5.38E-09 | AAkGAAAnkWA     | Disagree     |                                               |
| IME1  | CAGC       | ACCG | [0, 8, 9, 10]                | 6.99E-08 | AAkGAAAnkWA     | Disagree     |                                               |
| IME4  | CACA       | CACA | [1, 2]                       | 1.92E-11 |                 | Only DRIMUST |                                               |
| IME4  | ACACACACAC |      |                              | 6.14E-11 |                 | Only DRIMUST | ACACACACACA (ACACACAC)                        |
| INO2  | CATGTG     |      |                              | 5.50E-16 | CaCaTGc         | Disagree     | NHNGCAHRTGADNW (CATGTG)                       |
| INO2  | GCATGTG    |      |                              | 1.65E-13 | CaCaTGc         | Disagree     |                                               |
| INO4  | CACGTG     |      |                              | 4.64E-23 | CATGTGaa        | Agree        |                                               |
| INO4  | CATGTGAA   |      |                              | 4.48E-18 | CATGTGaa        | Agree        |                                               |
| IXR1  | AAAT       | CTCA | [2, 3, 4, 5, 7, 8, 9]        | 1.69E-09 |                 | Only DRIMUST | DNCAGVWNDNNWNHNHNHVVCCANNW (AAATNNNNNNNNCTCA) |
| IXR1  | CATC       | AATC | [3, 5]                       | 8.91E-09 |                 | Only DRIMUST |                                               |
| KRE33 | AATG       | CAAC | [9]                          | 4.16E-07 |                 | Only DRIMUST |                                               |
| KRE33 | AGAA       | CTGA | [0, 1, 5, 8]                 | 1.20E-06 |                 | Only DRIMUST |                                               |
| KSS1  | TATT       | GCTG | [0, 1, 2, 4, 5, 6, 7]        | 1.07E-10 |                 | Only DRIMUST |                                               |
| KSS1  | ATAT       | CAGC | [0, 1, 2]                    | 4.57E-08 |                 | Only DRIMUST |                                               |
| LEU3  | TAAT       | TTAG | [1, 2, 6, 7, 9, 10]          | 1.34E-11 | cCGgtacCGG      | Disagree     |                                               |
| LEU3  | ACCC       | ACAT | [2, 8]                       | 2.64E-10 | cCGgtacCGG      | Disagree     |                                               |
| MAC1  | CCTA       | GACT | [1, 9]                       | 1.02E-07 |                 | Disagree     |                                               |
| MAC1  | CCTATGACT  |      |                              | 1.65E-07 |                 | Disagree     |                                               |
| MAL13 | CCTCGACTAA |      |                              | 2.12E-14 |                 | Only DRIMUST |                                               |
| MAL13 | CTCGACTAA  |      |                              | 2.12E-14 |                 | Only DRIMUST |                                               |
| MAL33 | GCTT       | CCAC | [3, 4, 10]                   | 8.71E-11 |                 | Only DRIMUST |                                               |
| MAL33 | CACA       | CACA | [0, 1, 2, 3, 4, 5, 6]        | 3.51E-10 |                 | Only DRIMUST | ACACACACACA (CACACACA)                        |
| MBF1  | TCAT       | CTGT | [6]                          | 1.37E-07 |                 | Only DRIMUST |                                               |
| MBF1  | GTAA       | TAAG | [1, 7, 9]                    | 1.65E-07 |                 | Only DRIMUST |                                               |
| MBP1  | ACGCGT     |      |                              | 2.97E-44 | ACGCGT          | Agree        |                                               |
| MBP1  | CGCG       | CGCG | [1, 3, 6, 8, 9, 10]          | 2.76E-32 | ACGCGT          | Agree        |                                               |
| MCM1  | AAAT       | ATTT | [0, 1, 2, 4, 7, 9, 10]       | 6.73E-17 | CCnrAtnngg      | Disagree     |                                               |
| MCM1  | AATA       | TAAT | [0, 1, 3, 4, 7, 9]           | 3.39E-13 | CCnrAtnngg      | Disagree     |                                               |
| MDS3  | ATTT       | AAAT | [1, 2, 4, 5, 7, 8, 9, 10]    | 2.11E-20 |                 | Only DRIMUST |                                               |
| MDS3  | AAAT       | TCAA | [0, 1, 2, 3, 4, 5, 6, 7, 9]  | 8.70E-19 |                 | Only DRIMUST |                                               |
| MET18 | GTATCCAAGA |      |                              | 1.40E-12 |                 | Only DRIMUST |                                               |
| MET18 | CGAACAGAAT |      |                              | 2.39E-11 |                 | Only DRIMUST |                                               |
| MET28 | ATAA       | TTAT | [0, 3, 4, 6, 7]              | 3.11E-09 |                 | Only DRIMUST |                                               |
| MET28 | GGTC       | TTTA | [2, 10]                      | 1.96E-08 |                 | Only DRIMUST |                                               |
| MET31 | ATCC       | GTAC | [0, 5, 7, 10]                | 1.02E-08 |                 | Disagree     |                                               |
| MET31 | AGTA       | ATTA | [4, 5, 10]                   | 1.17E-08 | AAACTGTGG       | Disagree     |                                               |
| MET32 | CACGTGA    |      |                              | 3.33E-09 | AAACTGTGG       | Disagree     | CACGTG (CACGTGA)                              |
| MET32 | CACGTG     |      |                              | 5.43E-08 | AAACTGTGG       | Disagree     |                                               |
| MET4  | CACGTG     |      |                              | 6.90E-13 | RMmAwsTGKSgyGsc | Agree        |                                               |
| MET4  | CCAC       | GTGG | [0, 2, 4, 6, 10]             | 2.32E-11 | RMmAwsTGKSgyGsc | Agree        |                                               |
| MGA1  | TTAA       | AAGT | [0, 2, 4, 5, 6, 7, 9]        | 2.97E-10 |                 | Only DRIMUST |                                               |
| MGA1  | TTAA       | TTGA | [1, 2, 5, 7, 9, 10]          | 6.18E-10 |                 | Only DRIMUST |                                               |
| MIG1  | CCTA       | AGCT | [1, 2, 8]                    | 8.50E-10 |                 | Only DRIMUST |                                               |
| MIG1  | ATAC       | CGGA | [3, 9]                       | 1.34E-09 |                 | Only DRIMUST |                                               |
| MIG2  | ATTT       | AAAT | [0, 1, 4, 5, 6, 7, 8, 9, 10] | 3.29E-12 |                 | Only DRIMUST |                                               |
| MIG2  | ATAT       | TAAT | [4, 5, 7, 8, 10]             | 2.20E-10 |                 | Only DRIMUST |                                               |
| MIG3  | AAAT       | AATT | [3, 5, 6, 7, 8, 9, 10]       | 2.24E-20 |                 | Only DRIMUST |                                               |
| MIG3  | AAAT       | AAAA | [0, 1, 2, 3, 4, 6, 8, 9, 10] | 4.49E-16 |                 | Only DRIMUST |                                               |
| MOT3  | ATAT       | TATA | [0, 2, 4, 5, 6, 9]           | 1.80E-17 |                 | Disagree     |                                               |
| MOT3  | ATATTATCAT |      |                              | 2.15E-14 | yAGGyA          | Disagree     |                                               |
| MSN1  | GCCT       | CAAC | [4, 5]                       | 3.04E-11 |                 | Only DRIMUST |                                               |
| MSN1  | GCGA       | TCGC | [2, 7, 8, 9]                 | 3.59E-10 |                 | Only DRIMUST |                                               |
| MSN2  | ATAA       | ATAA | [0, 1, 4, 5, 8]              | 3.79E-08 | mAGGGGsgg       | Disagree     |                                               |
| MSN2  | ATGT       | GTGG | [5, 6, 10]                   | 1.80E-07 | mAGGGGsgg       | Disagree     |                                               |
| MSN4  | GCGG       | ACGA | [7, 10]                      | 8.63E-17 |                 | Disagree     |                                               |
| MSN4  | CGTAGGTCCA |      |                              | 6.02E-16 | mAGGGG          | Disagree     |                                               |

|        |            |      |                              |          |                 |              |
|--------|------------|------|------------------------------|----------|-----------------|--------------|
| MSS11  | ATTT       | TCAA | [0, 3, 9, 10]                | 8.28E-10 |                 | Only DRIMUST |
| MSS11  | ATTA       | TTAT | [0, 1, 4, 5, 8, 9]           | 3.84E-08 |                 | Only DRIMUST |
| MTH1   | CCAC       | CGGC | [0, 2, 3, 5, 7, 10]          | 6.85E-11 |                 | Only DRIMUST |
| MTH1   | CCCT       | GGAG | [1, 7, 8, 10]                | 1.38E-10 |                 | Only DRIMUST |
| NDD1   | GTCT       | GCGG | [1, 3, 4]                    | 4.81E-09 | CcNrAwnnGG      | Disagree     |
| NDD1   | GTCT       | CGGA | [2, 4, 5, 6, 10]             | 2.97E-08 | CcNrAwnnGG      | Disagree     |
| NDT80  | TAAT       | TATT | [0, 1, 9]                    | 1.81E-07 |                 | Only DRIMUST |
| NDT80  | TGCT       | TGAG | [2, 3, 6, 9]                 | 2.17E-07 |                 | Only DRIMUST |
| NNF2   | ATTT       | TAAT | [1, 3, 5, 6, 7, 8, 10]       | 3.10E-15 |                 | Only DRIMUST |
| NNF2   | TTAT       | AAAT | [2, 3, 5, 10]                | 2.39E-13 |                 | Only DRIMUST |
| NRG1   | GGGG       | TGCT | [1, 2]                       | 4.10E-10 | GGaCCCT         | Disagree     |
| NRG1   | ATGT       | TGTG | [0, 4, 5, 6]                 | 8.95E-10 | GGaCCCT         | Disagree     |
| OAF1   | GTTC       | GAGC | [0, 4, 6, 8]                 | 1.70E-10 |                 | Only DRIMUST |
| OAF1   | ACGA       | TCGT | [0, 1, 2, 4, 5, 10]          | 9.59E-10 |                 | Only DRIMUST |
| OPI1   | GCATGTGAA  |      |                              | 2.18E-09 | TCGAAyC         | Disagree     |
| OPI1   | CTAG       | ATTC | [1, 3]                       | 3.28E-09 | TCGAAyC         | Disagree     |
| PDC2   | TGTTGGAATA |      |                              | 3.52E-38 |                 | Only DRIMUST |
| PDC2   | CATATACGGT |      |                              | 2.50E-37 |                 | Only DRIMUST |
| PDR1   | AGATACTGTG |      |                              | 1.44E-17 | ccGCCgRAwr      | Disagree     |
| PDR1   | TCTCCTCGAC |      |                              | 1.44E-17 | ccGCCgRAwr      | Disagree     |
| PDR3   | TTGA       | TCAA | [4, 5, 6, 10]                | 5.05E-10 | TCCGCGGA        | Disagree     |
| PDR3   | ATAG       | ATCA | [0, 4, 6, 8, 9, 10]          | 6.76E-09 | TCCGCGGA        | Disagree     |
| PHD1   | ATTT       | TTTT | [1, 3, 5, 9, 10]             | 1.00E-11 | scnGCngg        | Disagree     |
| PHD1   | ATTT       | TTTC | [0, 2, 3, 4, 6]              | 3.47E-10 | scnGCngg        | Disagree     |
| PHO2   | ATAT       | TAGT | [2, 5, 7, 9]                 | 2.77E-08 | SGTGCgsygyG     | Disagree     |
| PHO2   | TTTA       | TAAA | [0, 1, 7, 8, 9]              | 4.38E-08 | SGTGCgsygyG     | Disagree     |
| PHO4   | TGACGATAG  |      |                              | 5.14E-08 | CACGTGs         | Disagree     |
| PHO4   | CACC       | GCTT | [0, 2, 3, 5, 9]              | 1.31E-07 | CACGTGs         | Disagree     |
| PIP2   | TTGACCGAAA |      |                              | 3.35E-09 |                 | Only DRIMUST |
| PIP2   | ACATGAGTGC |      |                              | 5.13E-09 |                 | Only DRIMUST |
| PPR1   | GCAA       | TTGC | [0, 4, 6]                    | 4.88E-08 |                 | Only DRIMUST |
| PPR1   | TCTA       | TAAC | [0, 4, 8, 10]                | 8.14E-08 |                 | Only DRIMUST |
| PUT3   | CGGG       | CCCG | [0, 2, 3, 8]                 | 2.05E-09 | CGGnnnnnnnnnCCG | Agree        |
| PUT3   | CCGG       | TCGA | [1, 3, 6, 10]                | 2.29E-09 | CGGnnnnnnnnnCCG | Agree        |
| RAP1   | CCCA       | ACAT | [1]                          | 9.46E-30 | cayCCrtrCa      | Agree        |
| RAP1   | ACCC       | ACAT | [2, 7]                       | 7.23E-27 | cayCCrtrCa      | Agree        |
| RCO1   | AGTC       | AAAC | [0, 6]                       | 9.47E-08 |                 | Only DRIMUST |
| RCO1   | GAGA       | TAAT | [3]                          | 1.19E-07 |                 | Only DRIMUST |
| RCS1   | ATTT       | AAAA | [1, 2, 4, 6, 7, 8, 10]       | 9.73E-22 | ggGTGcant       | Disagree     |
| RCS1   | ATTT       | AAAT | [0, 1, 2, 4, 7, 8, 9, 10]    | 5.95E-20 | ggGTGcant       | Disagree     |
| RDR1   | ATTT       | AAAT | [0, 2, 3, 4, 7, 8, 9, 10]    | 2.73E-17 |                 | Only DRIMUST |
| RDR1   | TTAT       | AAAT | [0, 1, 2, 3, 5, 6, 10]       | 2.20E-16 |                 | Only DRIMUST |
| RDS1   | TAAA       | TATT | [0, 1, 2, 4, 5, 7, 8, 10]    | 5.36E-27 | kCGGCCGa        | Disagree     |
| RDS1   | AATA       | TTTA | [0, 1, 2, 3, 4, 5, 7, 8, 10] | 1.55E-26 | kCGGCCGa        | Disagree     |
| REB1   | TTACCCG    |      |                              | 1.72E-77 | TTACCCG         | Agree        |
| REB1   | CGGGTAA    |      |                              | 1.58E-72 | TTACCCG         | Agree        |
| RFX1   | TATA       | TTTA | [1, 2, 3, 5, 9]              | 2.22E-10 | TtgccATggCAAC   | Disagree     |
| RFX1   | TTTT       | AAAA | [1, 2, 3, 5, 8, 10]          | 6.52E-10 | TtgccATggCAAC   | Disagree     |
| RGM1   | CCTCGACTAA |      |                              | 6.27E-28 |                 | Only DRIMUST |
| RGM1   | CTCGACTAA  |      |                              | 6.27E-28 |                 | Only DRIMUST |
| RGT1   | GGGG       | CCCC | [4, 5, 6, 7, 9, 10]          | 1.01E-10 | CGGAnnA         | Disagree     |
| RGT1   | ACAT       | CATC | [0, 2, 8]                    | 2.12E-10 | CGGAnnA         | Disagree     |
| RIM101 | CTAT       | AGTC | [2, 3, 5, 8, 9]              | 1.64E-08 | TGCCAAG         | Disagree     |
| RIM101 | GTAA       | ACTT | [1, 4, 8, 10]                | 6.20E-08 | TGCCAAG         | Disagree     |
| RLM1   | TAAT       | ATCA | [0, 3]                       | 1.97E-11 | CTAwwwTAG       | Agree        |
| RLM1   | TACG       | GTTA | [2, 3]                       | 9.98E-10 | CTAwwwTAG       | Agree        |
| RLR1   | TTTA       | AAAT | [0, 1, 2, 3, 4, 5, 6, 7, 9]  | 1.51E-18 | ATTTTCnnCwTt    | Disagree     |
| RLR1   | ATAT       | AATT | [0, 1, 3, 4, 5, 7, 8, 9, 10] | 3.24E-15 | ATTTTCnnCwTt    | Disagree     |
| RME1   | GGGC       | GCCC | [0, 3, 5, 8, 9]              | 6.81E-08 |                 | Only DRIMUST |
| RME1   | TCTC       | GATA | [0, 5, 7, 9]                 | 6.90E-08 |                 | Only DRIMUST |
| ROX1   | TTTT       | TTTT | [0, 9]                       | 7.08E-09 | ysyATTGTT       | Disagree     |
| ROX1   | ACCC       | GGCG | [1, 5, 7, 8, 10]             | 2.32E-08 | ysyATTGTT       | Disagree     |



|       |            |      |                              |          |                |              |                   |
|-------|------------|------|------------------------------|----------|----------------|--------------|-------------------|
| RPH1  | GGGG       | TCGA | [1]                          | 8.89E-11 | CCCCTTAAGG     | Disagree     |                   |
| RPH1  | ACCG       | CCCC | [1, 5, 8, 9, 10]             | 5.47E-10 | CCCCTTAAGG     | Disagree     |                   |
| RP1   | ATTT       | AAAT | [0, 1, 2, 4, 6, 7, 8, 10]    | 1.45E-14 |                | Only DRIMUST |                   |
| RP1   | AATT       | AATT | [2, 4, 5, 7, 8, 10]          | 3.43E-12 |                | Only DRIMUST |                   |
| RPN4  | AATATT     |      |                              | 1.23E-18 | GGTGGCAAA      | Disagree     |                   |
| RPN4  | TAAT       | ATTA | [0, 5, 8]                    | 1.05E-16 | GGTGGCAAA      | Disagree     |                   |
| RTG1  | CTCT       | AAAG | [0, 1, 4]                    | 3.08E-08 |                | Only DRIMUST |                   |
| RTG1  | AAAA       | TGTT | [0, 2, 4, 8]                 | 5.58E-08 |                | Only DRIMUST |                   |
| RTG3  | TGAT       | ATCA | [1, 3, 4, 5, 8]              | 6.81E-12 | GGTCAC         | Disagree     |                   |
| RTG3  | AAAT       | AATT | [0, 3, 4, 7, 8, 9, 10]       | 1.02E-09 | GGTCAC         | Disagree     |                   |
| RTS2  | TTGA       | TCAA | [1, 2, 6, 8]                 | 3.82E-08 |                | Only DRIMUST |                   |
| RTS2  | ATTG       | GATA | [0, 9]                       | 4.29E-08 |                | Only DRIMUST |                   |
| SFL1  | TTGA       | TATA | [1, 5, 10]                   | 2.50E-09 |                | Only DRIMUST |                   |
| SFL1  | TTTA       | GATA | [0, 4, 5]                    | 6.57E-09 |                | Only DRIMUST |                   |
| SFP1  | ATGTATGGGT |      |                              | 6.03E-08 | ayCcrTACay     | Agree        |                   |
| SFP1  | ACCATACAT  |      |                              | 9.15E-08 | ayCcrTACay     | Agree        |                   |
| SIG1  | ATCG       | CGAT | [0, 8]                       | 8.79E-09 | ArGmAwCrAmAA   | Disagree     |                   |
| SIG1  | ATCGCGAT   |      |                              | 3.49E-08 | ArGmAwCrAmAA   | Disagree     |                   |
| SIP3  | AAAT       | TCAA | [1, 2, 3, 4, 5, 6, 7, 9]     | 9.25E-14 |                | Only DRIMUST |                   |
| SIP3  | TTGA       | TCAA | [1, 5, 7, 8]                 | 4.23E-12 |                | Only DRIMUST |                   |
| SIP4  | ACAG       | TCGG | [2, 4, 7]                    | 5.76E-10 | CGGnynAATGGrr  | Disagree     |                   |
| SIP4  | TTTG       | TGGA | [4, 6, 9]                    | 4.25E-07 | CGGnynAATGGrr  | Disagree     |                   |
| SKN7  | GGCC       | GGCC | [0, 1, 2, 3, 6, 8, 9, 10]    | 2.39E-13 | GnCnnGsCs      | Agree        |                   |
| SKN7  | GGGC       | CCCC | [0, 1, 3, 7, 8, 9]           | 1.23E-10 | GnCnnGsCs      | Agree        |                   |
| SKO1  | ATCCACGAA  |      |                              | 8.49E-14 | ACGTCA         | Disagree     |                   |
| SKO1  | ATGACGT    |      |                              | 3.01E-13 | ACGTCA         | Disagree     |                   |
| SMK1  | TCAA       | AATG | [0, 1, 4, 5, 8, 9, 10]       | 2.44E-07 |                | Only DRIMUST |                   |
| SMK1  | CAGGCTCTA  |      |                              | 2.52E-07 |                | Only DRIMUST |                   |
| SMP1  | GACTAAGCA  |      |                              | 2.68E-13 |                | Disagree     |                   |
| SMP1  | CGACTAAGCA |      |                              | 5.47E-13 | ACTACTAwwwwTAG | Disagree     |                   |
| SNF1  | CTGA       | TTGA | [0, 5, 7, 8]                 | 2.40E-11 | ACTACTAwwwwTAG | Disagree     |                   |
| SNF1  | GATTCA     |      |                              | 7.06E-11 |                | Only DRIMUST |                   |
| SNT2  | TGATAGCGCC |      |                              | 4.72E-17 | yGGCGCTAyca    | Disagree     |                   |
| SNT2  | TCCT       | AGGA | [3, 4, 6, 7, 9]              | 2.49E-16 | yGGCGCTAyca    | Disagree     |                   |
| SOK2  | TATG       | GTTG | [1, 5]                       | 4.19E-08 | tGCagnna       | Disagree     |                   |
| SOK2  | ATCA       | TGCA | [1, 4, 9]                    | 1.08E-07 | tGCagnna       | Disagree     |                   |
| SPT10 | ATTT       | AAAT | [2, 3, 4, 5, 6, 7, 8, 9, 10] | 2.99E-13 |                | Only DRIMUST |                   |
| SPT10 | TCAAAAT    |      |                              | 1.96E-11 |                | Only DRIMUST |                   |
| SPT2  | TATA       | TATA | [4, 5, 7]                    | 2.01E-15 | yMtGTmTytAw    | Disagree     |                   |
| SPT2  | ATAT       | ATAA | [3, 5, 6, 8, 9, 10]          | 6.79E-15 | yMtGTmTytAw    | Disagree     |                   |
| SPT23 | AAAT       | ATTT | [0, 3, 5, 6, 7, 8, 9]        | 9.12E-15 | rAAATsaA       | Disagree     | ATSTTY (AAATATTT) |
| SPT23 | AATT       | AATT | [2, 3, 5, 6, 7, 10]          | 4.04E-14 | rAAATsaA       | Disagree     |                   |
| SRD1  | TATT       | AATA | [1, 5, 10]                   | 8.23E-12 |                | Only DRIMUST |                   |
| SRD1  | TATA       | AATA | [1, 3, 5, 7, 8]              | 3.80E-10 |                | Only DRIMUST |                   |
| STB1  | AGGCCTC    |      |                              | 1.89E-08 | rracGCsAa      | Disagree     |                   |
| STB1  | CTTG       | ATCG | [2, 3, 5, 6, 8, 9]           | 5.37E-08 | rracGCsAa      | Disagree     |                   |
| STB2  | CTCTAGTACT |      |                              | 1.52E-07 |                | Only DRIMUST |                   |
| STB2  | GGTT       | TCGA | [1, 4, 5, 8, 9]              | 1.61E-07 |                | Only DRIMUST |                   |
| STB4  | TCGG       | CCGA | [1, 6, 7, 9]                 | 5.76E-14 | TCGgnnCGA      | Agree        |                   |
| STB4  | TATT       | AGAC | [0, 2, 4, 5, 8, 9]           | 4.21E-10 | TCGgnnCGA      | Agree        |                   |
| STB5  | CCTA       | TAGC | [0, 6, 9]                    | 1.40E-08 | CGGnstTAta     | Disagree     |                   |
| STB5  | AGTA       | ACTA | [0, 3, 8, 9, 10]             | 3.26E-08 | CGGnstTAta     | Disagree     |                   |
| STB6  | AAAT       | TCAA | [2, 3, 4, 5, 8, 9, 10]       | 4.71E-14 |                | Only DRIMUST |                   |
| STB6  | TTGA       | TCAA | [1, 7, 8]                    | 2.85E-10 |                | Only DRIMUST |                   |
| STE12 | AACTTCTAGT |      |                              | 3.54E-25 | tgAAAC         | Disagree     |                   |
| STE12 | GAACTTCTAG |      |                              | 7.09E-25 | tgAAAC         | Disagree     |                   |
| STP1  | TATT       | TGTA | [2, 3, 4, 5, 6, 9]           | 1.48E-12 | rCGGcnnrCGGC   | Disagree     |                   |
| STP1  | ATTA       | TTTA | [1, 3, 4, 5, 7, 8, 9]        | 6.39E-12 | rCGGcnnrCGGC   | Disagree     |                   |
| STP2  | TATA       | AATT | [1, 3, 8, 10]                | 9.10E-13 |                | Only DRIMUST |                   |
| STP2  | ATAA       | AATT | [0, 1, 7, 8, 9, 10]          | 3.57E-11 |                | Only DRIMUST | GWARAA (ATAAAATT) |
| STP4  | CGAA       | CCTG | [6]                          | 2.66E-09 |                | Only DRIMUST |                   |
| STP4  | AACGAACAGA |      |                              | 4.01E-09 |                | Only DRIMUST |                   |

|         |            |      |                                 |          |              |              |              |                            |
|---------|------------|------|---------------------------------|----------|--------------|--------------|--------------|----------------------------|
| SUM1    | AATA       | TATT | [0, 1, 2, 3, 4, 6, 7, 8, 10]    | 5.44E-27 | gyGwCAswaaw  | AGyGwCACAAAk | Disagree     | AWTTWA (AATATATT)          |
| SUM1    | AATA       | TTAT | [0, 1, 2, 3, 5]                 | 1.08E-22 | gyGwCAswaaw  | AGyGwCACAAAk | Disagree     |                            |
| SUT1    | CGGCGT     |      |                                 | 5.02E-12 | gcsGsgnnsG   | CGCG         | Agree        |                            |
| SUT1    | CGGAGT     |      |                                 | 9.01E-12 | gcsGsgnnsG   | CGCG         | Agree        |                            |
| SUT2    | GGGGGGCAAG |      |                                 | 1.09E-07 |              |              | Only DRIMUST |                            |
| SUT2    | CGTACTGTGA |      |                                 | 1.09E-07 |              |              | Only DRIMUST |                            |
| SWI4    | CGCGAAA    |      |                                 | 4.28E-21 | CgCsAAA      | CnCGAAA      | Agree        |                            |
| SWI4    | CGCG       | AAAA | [0, 9, 10]                      | 7.38E-19 | CgCsAAA      | CnCGAAA      | Agree        |                            |
| SWI5    | CACA       | ACAC | [1, 7]                          | 1.47E-14 |              | kGCTGr       | Disagree     |                            |
| SWI5    | ACAC       | ACAC | [2]                             | 4.42E-13 |              | kGCTGr       | Disagree     |                            |
| SWI6    | ACGCGT     |      |                                 | 1.43E-25 | CGCgaaa      | CnCGAAA      | Disagree     |                            |
| SWI6    | CGCG       | CGCG | [1, 3, 5, 8, 9, 10]             | 2.76E-25 | CGCgaaa      | CnCGAAA      | Disagree     |                            |
| TBS1    | AATA       | TTAG | [5, 6]                          | 5.84E-09 |              |              | Only DRIMUST |                            |
| TBS1    | CCAACGTTG  |      |                                 | 6.05E-08 |              |              | Only DRIMUST | ACATTS (CCAACGTTG)         |
| TEC1    | TGTTGGAATA |      |                                 | 4.92E-21 | CATTcy       | CATTcy       | Disagree     |                            |
| TEC1    | TGATAATGTA |      |                                 | 4.97E-21 | CATTcy       | CATTcy       | Disagree     |                            |
| THI2    | TTGA       | ATTG | [0, 1, 3, 4, 5, 8, 9]           | 2.76E-08 | gmAAcyntwAgA |              | Disagree     |                            |
| THI2    | TCAT       | AATT | [0, 1, 2, 3, 7, 8, 9, 10]       | 3.74E-08 | gmAAcyntwAgA |              | Disagree     |                            |
| TOS8    | CCTCGACTAA |      |                                 | 1.55E-16 |              |              | Only DRIMUST |                            |
| TOS8    | CTCGACTAA  |      |                                 | 1.55E-16 |              |              | Only DRIMUST |                            |
| TYE7    | TCACGTG    |      |                                 | 4.01E-37 | tCACGTGa     | CAnnTG       | Agree        |                            |
| TYE7    | CACGTGA    |      |                                 | 9.16E-36 | tCACGTGa     | CAnnTG       | Agree        |                            |
| UGA3    | TATT       | AATA | [0, 1, 2, 3, 5, 6, 9, 10]       | 4.43E-12 |              | CCGnnnnCGG   | Disagree     | WTWAAA (TATTAATA)          |
| UGA3    | TAAT       | GTAA | [0, 1, 5, 6, 9]                 | 1.82E-09 |              | CCGnnnnCGG   | Disagree     |                            |
| UME6    | AGCCGCC    |      |                                 | 7.57E-49 | taGCCGCCsa   | wGCCGCCGw    | Agree        |                            |
| UME6    | TAGC       | CGCC | [0]                             | 5.16E-48 | taGCCGCCsa   | wGCCGCCGw    | Agree        |                            |
| UPC2    | TTTT       | AAAT | [1, 3, 5, 6, 7, 8, 9]           | 1.30E-22 |              |              | Only DRIMUST |                            |
| UPC2    | AATA       | TTTA | [0, 1, 2, 4, 7, 8, 9, 10]       | 2.46E-21 |              |              | Only DRIMUST |                            |
| USV1    | TGCCATAAA  |      |                                 | 1.67E-07 |              |              | Only DRIMUST |                            |
| USV1    | ACGA       | TCGT | [1]                             | 2.31E-07 |              |              | Only DRIMUST |                            |
| WAR1    | ATTT       | AAAA | [1, 3, 4, 5, 7, 9]              | 5.88E-15 |              |              | Only DRIMUST |                            |
| WAR1    | ATGA       | TTAT | [0, 2, 3, 4, 5, 7, 8, 9]        | 4.98E-12 |              |              | Only DRIMUST |                            |
| WTM1    | AAAT       | AATT | [3, 6, 7, 9]                    | 1.36E-16 |              |              | Only DRIMUST |                            |
| WTM1    | AAAT       | TCAA | [2, 3, 4, 5, 7, 8, 9]           | 1.92E-16 |              |              | Only DRIMUST |                            |
| WTM2    | TGAG       | CAGT | [2, 6, 8]                       | 2.24E-09 |              |              | Only DRIMUST |                            |
| WTM2    | TTAA       | TTAA | [4, 5, 8, 10]                   | 2.91E-08 |              |              | Only DRIMUST |                            |
| XBP1    | CACG       | CGGC | [0, 2, 3, 5, 6, 7, 8, 10]       | 7.44E-15 |              | CTTCGAG      | Disagree     |                            |
| XBP1    | CCTCGACTAA |      |                                 | 1.08E-13 |              | CTTCGAG      | Disagree     |                            |
| YAP1    | TTAA       | AATA | [0, 1, 2, 3, 4, 6, 7, 9]        | 2.69E-14 | TtAGTmAGc    | TTAsTmA      | Agree        |                            |
| YAP1    | ATTA       | TAAT | [1, 2, 3, 6, 8, 10]             | 8.08E-13 | TtAGTmAGc    | TTAsTmA      | Agree        |                            |
| YAP3    | GACT       | TAGT | [8, 9, 10]                      | 4.44E-08 |              | TTACTAA      | Disagree     |                            |
| YAP3    | TATG       | GTAT | [6]                             | 1.79E-07 |              | TTACTAA      | Disagree     |                            |
| YAP5    | GCGG       | ACGA | [7]                             | 5.20E-36 |              | TTACTAA      | Disagree     |                            |
| YAP5    | TCCA       | ATCC | [9, 10]                         | 3.42E-33 |              | TTACTAA      | Disagree     |                            |
| YAP6    | TTTT       | TTTT | [0, 6, 9, 10]                   | 6.37E-12 |              | TTACTAA      | Disagree     |                            |
| YAP6    | CCTA       | CTTC | [10]                            | 6.96E-12 |              | TTACTAA      | Disagree     |                            |
| YAP7    | ATTG       | AATG | [0, 2, 3, 4, 5, 6, 7, 8]        | 8.81E-11 | mTkAsTmA     | TTACTAA      | Disagree     |                            |
| YAP7    | AATA       | TTAA | [0, 1, 5, 6, 8, 10]             | 5.12E-10 | mTkAsTmA     | TTACTAA      | Disagree     |                            |
| YBL054W | AAAT       | TGTA | [0, 3, 5, 6, 7, 8, 9]           | 1.12E-10 |              |              | Only DRIMUST |                            |
| YBL054W | TGAT       | TTTG | [0, 1, 2, 3, 6, 7, 8]           | 1.03E-08 |              |              | Only DRIMUST |                            |
| YBR239c | TTTT       | AAAT | [0, 1, 3, 4, 5, 6, 7, 8, 9]     | 3.62E-18 |              |              | Only DRIMUST |                            |
| YBR239c | TTTT       | AATT | [0, 1, 2, 4, 5, 7, 8, 9, 10]    | 4.65E-17 |              |              | Only DRIMUST |                            |
| YBR267W | AAGA       | TGAT | [2, 3, 4, 6]                    | 9.85E-12 |              |              | Only DRIMUST |                            |
| YBR267W | ATGAAG     |      |                                 | 1.09E-10 |              |              | Only DRIMUST |                            |
| YDR026c | CCGGGTAAA  |      |                                 | 1.70E-23 | tTACCCGGm    |              | Disagree     | DNKCCGGGTAAADW (CCGGGTAAA) |
| YDR026c | CCGG       | GTAA | [0, 8, 10]                      | 5.79E-20 | tTACCCGGm    |              | Disagree     |                            |
| YDR049W | ATTT       | AAAT | [1, 4, 7, 8, 9, 10]             | 1.48E-14 |              |              | Only DRIMUST |                            |
| YDR049W | TTTT       | AATT | [0, 1, 2, 3, 4, 6, 7, 8, 9, 10] | 1.07E-12 |              |              | Only DRIMUST |                            |
| YDR266c | TTGA       | TCAA | [1, 2, 5, 6, 7, 8, 9]           | 1.74E-12 |              |              | Only DRIMUST |                            |
| YDR266c | ATTT       | AAAT | [1, 2, 4, 7, 8, 9, 10]          | 2.46E-09 |              |              | Only DRIMUST |                            |
| YDR520C | CTCCGGCGG  |      |                                 | 1.06E-09 |              |              | Only DRIMUST |                            |
| YDR520C | TCTCCGGCGG |      |                                 | 2.93E-08 |              |              | Only DRIMUST |                            |

|         |            |      |                              |          |                |              |
|---------|------------|------|------------------------------|----------|----------------|--------------|
| YER051w | ATTT       | AAAT | [1, 4, 7, 8, 9, 10]          | 2.45E-16 |                | Only DRIMUST |
| YER051w | TTAA       | TCAT | [0, 1, 3, 4, 5, 8, 10]       | 1.26E-12 |                | Only DRIMUST |
| YER130C | ATTT       | AAAT | [1, 4, 7, 8, 9, 10]          | 2.73E-15 |                | Only DRIMUST |
| YER130C | AATT       | TAAA | [2, 3, 4, 7, 8, 9, 10]       | 6.52E-13 |                | Only DRIMUST |
| YER184C | TTCA       | TGAA | [1, 2, 6]                    | 2.84E-10 |                | Only DRIMUST |
| YER184C | ATTC       | CGAG | [2, 4, 9, 10]                | 1.65E-07 |                | Only DRIMUST |
| YFLO44C | ATTT       | TTAT | [3, 4, 6, 7, 9, 10]          | 3.24E-13 |                | Only DRIMUST |
| YFLO44C | TTCAAT     |      |                              | 1.86E-12 |                | Only DRIMUST |
| YFLO52w | TTGA       | TCAA | [1, 3, 4, 5, 6, 7, 8, 9, 10] | 1.20E-15 |                | Only DRIMUST |
| YFLO52w | AAAT       | TCAA | [1, 2, 3, 4, 5, 7, 8]        | 5.21E-14 |                | Only DRIMUST |
| YGR067C | ATTT       | TAAT | [0, 1, 2, 3, 5, 6, 7, 8, 10] | 6.52E-13 |                | Only DRIMUST |
| YGR067C | ATTT       | AAAT | [0, 1, 2, 4, 6, 8, 9, 10]    | 1.10E-12 |                | Only DRIMUST |
| YHP1    | TGAA       | AATT | [1, 2, 3, 4, 5, 6, 7, 9, 10] | 1.87E-11 | TAATTG         | Disagree     |
| YHP1    | AAAT       | TCAA | [0, 2, 3, 5, 6, 7, 8, 10]    | 2.00E-09 | TAATTG         | Disagree     |
| YJL206C | TGCAACGCTA |      |                              | 8.11E-10 |                | Only DRIMUST |
| YJL206C | GTATTGCAAC |      |                              | 8.11E-10 |                | Only DRIMUST |
| YKL222C | CTAA       | ATTT | [0, 1, 4, 7, 8, 9, 10]       | 2.14E-13 |                | Only DRIMUST |
| YKL222C | TAAA       | ATTT | [5, 6, 7, 9]                 | 4.74E-12 |                | Only DRIMUST |
| YKR064W | ATTT       | AAAT | [1, 2, 4, 5, 6, 7, 8, 9, 10] | 4.39E-17 |                | Only DRIMUST |
| YKR064W | AATT       | TGAA | [1, 2, 3, 5, 6, 7, 8, 9, 10] | 1.24E-13 |                | Only DRIMUST |
| YLR278C | ATTT       | TCAA | [0, 2, 3, 5, 6, 7]           | 1.81E-13 |                | Only DRIMUST |
| YLR278C | TTTA       | AATT | [1, 2, 3, 4, 5, 7, 8, 10]    | 2.24E-13 |                | Only DRIMUST |
| YML081W | ATCGTCTAT  |      |                              | 2.43E-14 |                | Only DRIMUST |
| YML081W | ATTATCATAT |      |                              | 3.18E-14 |                | Only DRIMUST |
| YNR063W | AAAT       | ATTT | [2, 3, 4, 6, 7, 8, 9, 10]    | 3.12E-13 |                | Only DRIMUST |
| YNR063W | AATT       | AATT | [2, 3, 4, 7, 8, 9, 10]       | 1.63E-12 |                | Only DRIMUST |
| YOX1    | AAAT       | TTTT | [0, 1, 2, 3, 4, 6, 9, 10]    | 6.09E-26 | YAATA          | Agree        |
| YOX1    | AAAT       | ATTT | [0, 1, 2, 3, 4, 5, 6, 7, 9]  | 5.79E-23 | YAATA          | Agree        |
| YPR022C | ATTT       | AAAT | [0, 6, 7, 9, 10]             | 2.94E-12 |                | Only DRIMUST |
| YPR022C | TATT       | AATA | [0, 2, 3, 5, 6, 8, 10]       | 7.90E-11 |                | Only DRIMUST |
| YPR196W | GGTC       | AGCG | [7, 8]                       | 1.47E-10 |                | Only DRIMUST |
| YPR196W | AAGTATCCAA |      |                              | 2.54E-10 |                | Only DRIMUST |
| YRR1    | CAAC       | TGAG | [3, 7, 10]                   | 7.86E-09 |                | Only DRIMUST |
| YRR1    | TCCA       | TCCA | [2, 8, 10]                   | 1.87E-08 |                | Only DRIMUST |
| ZAP1    | CAGA       | CCTG | [2, 6]                       | 1.40E-12 | ACCCTmAAGGTyrT | Disagree     |
| ZAP1    | AATATT     |      |                              | 6.18E-11 | ACCCTmAAGGTyrT | Disagree     |
| ZMS1    | GCGG       | GCAG | [2, 3, 6, 8]                 | 3.03E-09 |                | Only DRIMUST |
| ZMS1    | CTTCGACCC  |      |                              | 3.74E-08 |                | Only DRIMUST |
